1 A nuclear receptor facilitates differentiation of human PSCs into more  
2 mature hepatocytes

3  
4 Haiting Ma<sup>1</sup>, Esmée de Zwaan<sup>1</sup>, Yang Eric Guo<sup>1</sup>, Paloma Cejas<sup>2,3</sup>, Prathapan Thiru<sup>1</sup>,  
5 Martijn van de Bunt<sup>4</sup>, Jacob F. Jeppesen<sup>1,4,5</sup>, Sudeepa Syamala<sup>2,3</sup>, Alessandra  
6 Dall'Agnese<sup>1</sup>, Brian J. Abraham<sup>1,6</sup>, Dongdong Fu<sup>1</sup>, Carrie Garrett-Engele<sup>1</sup>, Tony Lee<sup>1</sup>,  
7 Henry W Long<sup>2,3</sup>, Linda G. Griffith<sup>5,7</sup>, Richard A. Young<sup>1,8</sup>, Rudolf Jaenisch<sup>1,8\*</sup>

8  
9 <sup>1</sup>Whitehead Institute for Biomedical Research, Cambridge, MA 02142, USA

10 <sup>2</sup>Center for Functional Cancer Epigenetics, Dana-Farber Cancer Institute, Boston,  
11 Massachusetts, USA.

12 <sup>3</sup>Department of Medical Oncology, Dana-Farber Cancer Institute and Harvard Medical  
13 School, Boston, Massachusetts, USA.

14 <sup>4</sup>Global Drug Discovery, Novo Nordisk, Cambridge, MA 02142, USA

15 <sup>5</sup>Department of Biological Engineering, Massachusetts Institute of Technology,  
16 Cambridge, MA 02142, USA

17 <sup>6</sup>Computational Biology, St Jude Children's Research Hospital, Memphis, TN, USA.

18 <sup>7</sup>Department of Mechanical Engineering, Massachusetts Institute of  
19 Technology, Cambridge, MA, USA

20 <sup>8</sup>Department of Biology, Massachusetts Institute of Technology, Cambridge, MA 02142

21 \* Correspondence: [jaenisch@wi.mit.edu](mailto:jaenisch@wi.mit.edu) (R.J)

22

23

## 24 **Summary**

25 The capacity to generate functional hepatocytes from renewable human pluripotent stem cells (hPSCs)  
26 could address limited supplies of primary human hepatocytes. However, hepatocytes differentiated from  
27 hPSCs *in vitro* are functionally immature. To understand mechanisms regulating maturation of *in vitro*  
28 derived hepatocytes, we developed a 3D spheroid differentiation system and compared gene regulatory  
29 elements in uncultured human primary hepatocytes with those in hepatocytes that were differentiated in  
30 2D or 3D conditions from human PSCs by RNA-seq, ATAC-seq, and H3K27Ac ChIP-seq. Three-  
31 dimensional differentiation improved enhancer activity and expression of transcription factor *ONECUT1*,  
32 but was insufficient to upregulate human-specific mature hepatocytes marker gene *CYP3A4* or super-  
33 enhancer regulated transcription factor gene *NFIC*. Regulome comparisons showed reduced enrichment  
34 of thyroid receptor *THRB* motifs in accessible chromatin and in active enhancers without reduced  
35 transcription of *THRB*, suggesting the regulation at the level of *THRB* ligands in PSC-differentiated  
36 hepatocytes. Addition of thyroid hormone T3 to the PSC-differentiated hepatocytes increased *CYP3A4*  
37 expression. T3 increased binding of *THRB* to the *CYP3A4* proximal enhancer and restored the super-  
38 enhancer status and gene expression of *NFIC* and reduced expression of *AFP*. The resultant hPSC-  
39 hepatocytes showed gene expression, epigenetic status and super-enhancer landscape closer to primary  
40 hepatocytes and activated regulatory regions including non-coding SNPs associated with liver-related  
41 diseases. Transplanting the 3D PSC-hepatocytes into immunocompromised mice resulted in engraftment  
42 of human hepatocytes in the mouse liver parenchyma without disrupting normal liver histology at 6  
43 months after transplantation. This work provides insights into the functions of nuclear receptor *THRB* and  
44 highlights the importance of the environmental factors-nuclear receptors axis in regulating maturation of  
45 human PSC-differentiated cell types.

46

## 47 **Keywords**

48 Human pluripotent stem-cells, hepatocytes differentiation and maturation, nuclear receptors, epigenetics,  
49 transcriptional regulation, pBAF, 3D spheroid culture.

50

## 51 Introduction

52 The liver is an essential organ with diverse functions including digestion, metabolism, and detoxification  
53 (Godoy et al., 2013) with hepatocytes being the major parenchymal cell type carrying out the essential  
54 functions (Aizarani et al., 2019; MacParland et al., 2018). For example, hepatocytes absorb multiple  
55 chemicals including many clinically used drugs by drug transporter proteins (Fahrmayr et al., 2010) and  
56 metabolize the chemicals by cytochrome P450 enzymes including CYP3A4 and CYP2C9 (Zanger and  
57 Schwab, 2013). Furthermore, liver or hepatocyte transplantations are the only known effective treatments  
58 for multiple end-stage liver disease (Bhatia et al., 2014). Due to limitations of alternative sources, primary  
59 hepatocytes remain the gold standard for hepatocytes, presenting a challenge because of limited supply  
60 and of variability associated with genetic and environmental characteristics of donors. Facing the demand  
61 for hepatocytes for research and clinical uses, generating functional and mature hepatocytes from  
62 sources including *in vitro* expansion of primary hepatocytes (Hu et al., 2018; Michailidis et al., 2020; Peng  
63 et al., 2018), adult stem cells (Huch et al., 2015), human fibroblast (Xie et al., 2019) and renewable  
64 human pluripotent stem cells have been recognized as possible solutions (Zaret and Grompe, 2008).

65 Mechanisms regulating hepatocytes specification during embryonic development (Prior et al.,  
66 2019; Si-Tayeb et al., 2010b) provided insights for *in vitro* differentiation of hepatocyte-like cells from  
67 hPSC with 2D differentiation protocols (Ang et al., 2018; Si-Tayeb et al., 2010a). Although various 3D  
68 differentiation systems (Chen et al., 2020; Ogawa et al., 2013; Takebe et al., 2013) improved hepatocyte  
69 gene expression, the *in vitro* generated hepatocyte-like cells showed function and gene expression  
70 profiles similar to fetal hepatocytes (Camp et al., 2017; Chen et al., 2018). The mechanisms resulting in  
71 improved gene expression with 3D differentiation and the epigenetic difference between PSC-  
72 hepatocytes and primary hepatocytes *in vivo* remain to be characterized. *In vivo* environmental factors  
73 including hormones, nutrients, and metabolites that are different from the *in vitro* culture conditions could  
74 contribute to functional maturation by epigenetic mechanisms (Chen et al., 2018).

75 We developed a 3D spheroid hepatocyte differentiation system, and profiled gene expression,  
76 chromatin accessibility, and enhancer landscapes of uncultured primary human hepatocytes and PSC-  
77 differentiated hepatocytes in 2D and 3D differentiation. In contrast to 2D differentiated hepatocytes, 3D  
78 differentiation improved expression of *ONECUT1*, a critical liver enriched transcription factor (Kyrnizi et  
79 al., 2006) but expression of CYP genes including *CYP3A4* remained low. Compared to primary

80 hepatocytes, 3D differentiated hepatocytes showed reduced activity for nuclear receptor THR<sub>B</sub>. Addition  
81 of the THR<sub>B</sub> ligand T<sub>3</sub> increased *CYP3A4* expression and improved both gene expression and H3K27Ac  
82 status for multiple hepatocyte genes, including the liver super-enhancer-regulated gene *NFIC*. These  
83 results suggest that environmental influences relayed by nuclear receptors regulate cell states in the  
84 process of hepatocyte maturation and the cell maturation states can be modulated by their ligands.

85

## 86 **Results**

### 87 **THR<sub>B</sub> motif enrichment in accessible chromatin and active enhancers differed between primary** 88 **human hepatocytes and PSC-hepatocytes**

89 We differentiated H1-OCT4GFP hPSCs (Zwaka and Thomson, 2003) into definitive endoderm (Ma et al.,  
90 2020), followed by liver induction with FGF2 and BMP4 (Si-Tayeb et al., 2010b), and William's E based  
91 medium to generate hepatocyte-like cells with improved ALB expression, reduced AFP expression, and  
92 similar proportions of cells expressing HNF4A (**Figure S1**). Based on the 2D differentiation protocol, we  
93 developed a spheroid-based 3D hepatocyte differentiation system (**Figure 1A**) with the following  
94 modifications. 1. Adding a gut tube stage by FGF7 treatment after definitive endoderm stage (**Figure**  
95 **S1E**). 2. Including a Notch inhibitor and a TGF $\beta$  inhibitor to reduce cystic formation that suggests bile duct  
96 epithelial cells (Huch et al., 2015) (**Figure S1F**). 3. Dissociated and aggregated cells to spheroids during  
97 stage 3 (**Figure S1G**). 4. Using less insulin (1%) in the culture medium, and adding forskolin which was  
98 shown to maintain primary hepatocytes in long-term culture (Xiang et al., 2019) and to improve  
99 hepatocyte differentiation (Ogawa et al., 2013). Additionally, we supplemented the medium with linoleic  
100 acid and micronutrients. The 3D differentiation protocol (**Figure 1A**) generated hepatocyte-like cells with  
101 improved expression of hepatocytes markers compared to 2D differentiation, although fetal hepatocyte  
102 gene *AFP* remained highly expressed (**Figure S1I-J**).

103

104 To understand the transcriptional basis of immaturity of PSC-hepatocytes, we compared mRNA-  
105 transcriptomes of non-cultured human primary hepatocytes and hPSC differentiated hepatocytes under  
106 2D and 3D conditions (**Figure 1B**). Principal component analyses of RNA-seq results showed that 3D  
107 PSC-hepatocytes grouped closer with primary hepatocytes, whereas 2D PSC-hepatocytes were closer to  
108 fetal hepatocytes (RNA-seq results from (Xie et al., 2019)) (**Figure 1C**). KEGG pathway analysis

109 identified several hepatocyte functions (including complement, coagulation factors, and cytochrome  
110 P450) were downregulated in 2D PSC-hepatocytes compared to primary hepatocyte (**Figure S2B**,  
111  **$P < 0.05$** ). Gene set enrichment analysis (GSEA) also showed hepatocyte functions such as the drug  
112 metabolism/CYP P450 pathways and protein secretion were downregulated, whereas cell cycle  
113 regulators and receptors-ECM interactions were upregulated in 2D PSC-hepatocytes as compared to  
114 primary hepatocytes (**Figure S2 C-D, nominal  $P$ -value  $< 0.05$** ). In contrast, these components were not  
115 significantly different between 3D PSC-hepatocytes and primary hepatocytes (**Figure S2F-G**). Compared  
116 to 2D PSC-hepatocytes, 3D PSC-hepatocytes showed improved expression of genes associated with  
117 liver functions (**Figure S2 H-J**). Consistent with gene expression analysis (**Figure S1J**), *ALB* expression  
118 was increased about 9-fold in 3D as compared to 2D PSC-hepatocytes (**Figure 1D, Figure S1J**). The  
119 expression of a key drug metabolism enzyme and mature hepatocyte marker *CYP3A4* also increased  
120 about 80-fold in 3D as compared to 2D PSC-hepatocytes (**Figure 1D, Figure S1J**). However, the  
121 absolute expression levels were only approximately 1% of those in primary hepatocytes. We conclude  
122 that culturing PSC-hepatocytes in 3D increases expression of complements and coagulation factors but  
123 failed to improve hepatocyte maturation genes including *CYP3A4*.

124  
125 To examine gene regulatory elements that are typically located in accessible chromatin regions, we  
126 performed ATAC-seq (Buenrostro et al., 2013) on 2D PSC-hepatocytes, 3D PSC-hepatocytes, and  
127 primary hepatocytes (**Figure 1B**). Consistent with improved expression of *ONECUT1* in 3D PSC-  
128 hepatocytes compared to the 2D PSC-hepatocytes (**Figure S1J**), 3D PSC-hepatocytes showed  
129 increased chromatin accessibility at the 5' region of *ONECUT1* locus (**Figure 1E, top panel**). In contrast,  
130 the *AFP* gene that was expressed in PSC-hepatocytes showed ectopic chromatin accessibility at the 3' of  
131 *AFP* locus as compared to primary adult hepatocytes (**Figure 1E, bottom panel**). Transcription factor  
132 motifs enrichment analysis in ATAC-seq peaks showed more significant enrichment of the thyroid  
133 hormone receptor  $\beta$  (THRB) motif in primary hepatocytes as compared to 3D PSC-hepatocytes (**Figure**  
134 **1F**).

135  
136 We also performed H3K27Ac ChIP-seq to survey active promoters and enhancers landscape (Creyghton  
137 et al., 2010) in the three cell types (**Figure 1B**). Comparative analyses of primary hepatocytes and PSC-

138 hepatocytes indicated lower enhancer activity in PSC-hepatocytes as compared to primary hepatocytes  
139 (**Figure 1G**). Consistent with the gene expression and chromatin accessibility data, 3D differentiation  
140 improved H3K27Ac signal of the *ONECUT1* locus (**Figure 1H**). Furthermore, we identified super-  
141 enhancers associated genes, a group of genes with of disproportionately high density of H3K27Ac ChIP-  
142 seq signals (Whyte et al., 2013). *NFIC* was identified as one of the top super-enhancer genes in primary  
143 hepatocytes and showed increased H3K27Ac signals compared to PSC-hepatocytes (**Figure 1H**).  
144 Additionally, correlation studies of super-enhancer and RNA-seq results showed super-enhancer tended  
145 to be higher expressed (**Figure 2A-E**). Analysis of super-enhancer genes from H3K27Ac ChIP-seq and  
146 highly expressed genes from RNA seq showed two groups of genes: super-enhancer associated genes  
147 that are more regulated and are associated with disease (insulin resistance, type 2 diabetes), whereas  
148 highly expressed but non-super-enhancer-regulated genes were enriched in more basic hepatocyte  
149 functions such as nitrogen metabolism (**Figure 2F**).

150

151 Motif analysis from the H3K27Ac ChIP-seq showed that *THRB* motifs were more significantly enriched in  
152 primary hepatocytes than in 3D PSC-hepatocytes (**Figure. 1F**). However, gene expression of *THRB* did  
153 not correlate with the reduced enrichment of *THRB* motifs in accessible chromatin and active enhancers  
154 (**Figure 1I**). Transcription factor *THRB* is a nuclear receptor (NR1A2) that form heterodimeric DNA  
155 binding complex with *RXRA* based on availability of cognate ligands, thereby relaying information from  
156 the environment to the cells (Evans and Mangelsdorf, 2014). These data suggest that the differential  
157 enrichment of *THRB* motifs in accessible chromatin and active enhancers between primary hepatocytes  
158 and 3D-PSC-hepatocytes are potentially regulated at the levels of *THRB* ligand availability.

159

#### 160 **THRB upregulated *CYP3A4* by binding to the *CYP3A4* proximal enhancer**

161 We hypothesized that *THRB* may improve PSC-hepatocytes maturity. Addition of 3  $\mu$ M T3 to the medium  
162 increased *CYP3A4* transcript (**Figure 3A**) and protein (**Figure 3B**) levels. In contrast, adding retinoic acid  
163 (RA, the ligand for another nuclear receptor *RARA*) did not improve *CYP3A4* expression (**Figure S3A**).  
164 Furthermore, T3 was required for the maintenance of the high expression of *CYP3A4* (**Figure S3B**).

165

166 To examine the mechanisms of upregulation of *CYP3A4* by T3, we identified a promoter and two 5'  
167 enhancers (proximal and distal enhancer) active in primary hepatocytes and 3D PSC-hepatocytes  
168 (**Figure 3C**). Analysis of *CYP3A4* 5' regulatory elements determined that 3D PSC-hepatocytes with lower  
169 *CYP3A4* expression compared to primary hepatocytes, had weak signals at the proximal enhancer  
170 compared to primary hepatocytes. Furthermore, a *THRB* binding motif was detected in the proximal  
171 enhancer that overlapped with an ATAC-seq peak in 3D PSC-hepatocytes (**Figure 3C**). To test if *THRB*  
172 could bind to the proximal enhancer, we examined anti-FLAG ChIP-seq datasets from HepG2 cells with a  
173 C-terminal FLAG tagging of the endogenous *THRB* gene (*THRB*-FLAG HepG2) (Partridge et al., 2020)  
174 and found anti-FLAG-*THRB* ChIP-seq peaks overlapping with the proximal enhancer (**Figure 3C**). **Figure**  
175 **3D** shows that in primary hepatocytes 74% and in 3D PSC-hepatocytes 54% of the ATAC-seq peaks  
176 overlapped with *THRB* peaks, consistent with contribution of *THRB* binding to gene regulatory elements  
177 in mature hepatocytes.

178

179 We used *THRB*-FLAG HepG2 cells (Partridge et al., 2020) to further dissect the mechanisms of *CYP3A4*  
180 regulation by T3. Culturing of *THRB*-FLAG HepG2 cells in T3 containing medium resulted in increased  
181 *CYP3A4* activity and *CYP3A4* expression (**Figure S4A-B**). When *THRB*-FLAG HepG2 cells were cultured  
182 in William's E medium with different concentrations of T3, we found that 3 nM T3 mostly efficiently  
183 upregulated *CYP3A4* enzyme activity, and this was abolished with thyroid hormone receptor antagonist  
184 (1-850) (**Figure S4C-D**). Furthermore, endoribonuclease prep siRNA (esiRNA) knockdown of *THRB*  
185 showed that *THRB* was required for *CYP3A4* upregulation by T3 (**Figure S4E**). To test *THRB* directly  
186 affects *CYP3A4* activity by interacting with the proximal enhancer, we generated proximal enhancer  
187 deletion clones by CRISPR-mediated deletion (**Figure S4I-J**) and found that the upregulation of *CYP3A4*  
188 by T3 was reduced in the *CYP3A4* proximal enhancer deletion cells (**Figure S4L**). Additionally, we  
189 performed Cut-and-qPCR in *THRB*-FLAG HepG2 cells with anti-FLAG antibody with or without T3 using  
190 primers for the *CYP3A4* proximal enhancer. T3 increased the binding of *THRB* to the *CYP3A4* proximal  
191 enhancer compared to control (**Figure 3E**). These results suggest that *THRB* functions in regulating  
192 *CYP3A4* expression by binding to *CYP3A4* proximal enhancer in a T3-regulated manner.

193

194 To test if the mechanism applied to PSC-hepatocytes, we generated an inducible CRISPR activation PSC  
195 cell line (**Figure S5A-B**). Doxycycline (DOX) mediated induction of *PDX1* expression with a sgRNA  
196 targeting the *PDX1* promoter verified the inducible CRISPR activation system (**Figure S5C-G**). We  
197 transduced the inducible CRISPR activation PSCs with sgRNA targeting the *CYP3A4* proximal enhancer,  
198 and found that DOX added to hepatocyte spheroids generated from these cells increased *CYP3A4*  
199 expression but not another hepatocyte gene *ALB* (**Figure 3F**). These results suggest that thyroid  
200 hormone mediated THRB binding to the *CYP3A4* proximal enhancer to regulate *CYP3A4* expression.

201

### 202 **T3 enhances differentiation to more mature hepatocytes**

203 In addition to adding T3, we removed oncostatin from the medium because oncostatin levels are  
204 downregulated upon birth (Kamiya et al., 2001), and we supplemented the media with antioxidant N-  
205 acetyl cysteine at the final stage of differentiation (**Figure S6A**). Quantitative-RT-PCR analysis of  
206 differentiation stages showed expected gene expression changes (**Figure S6B**). Immunofluorescence  
207 staining showed expression of HNF4A and ALB in most control cells and T3 treated cells (**Figure 4A**).  
208 Consistent with RNA expression levels, *CYP3A4* protein levels increased, and AFP protein levels  
209 decreased upon T3 treatment (**Figure 4A**). KeyGenes analysis (Roost et al., 2015) of RNA-seq results  
210 showed that T3 treated hepatocytes were closer to primary hepatocytes than the control cells (**Figure**  
211 **4B**), and T3 treatment increased expression of *CYP3A4* and *CYP2C9* (**Figure 4C-D**).

212

213 Further analysis of liver metabolic genes and disease relevant genes indicate that the PSC-hepatocytes  
214 generated with the optimized differentiation system were more mature. The drug metabolism gene  
215 *UGT1A1* and glycogen metabolism gene *GBE1* were upregulated in 3D-PSC-hepatocytes, and T3  
216 treatment of 3D-PSC-hepatocytes further increased their expression (**Figure 4E**). Additionally, expression  
217 of glucose production regulator gene *G6PC*, clotting factors *F5*, and complement gene *C5* in 3D-PSC-  
218 hepatocytes were expressed at levels comparable to primary hepatocytes (**Figure S6C**). Furthermore,  
219 multiple genes encoding enzymes in the urea cycle (including the most commonly mutated gene in urea  
220 cycle disorder *OTC* and other genes encoding enzymes for the pathway: *NAGS*, *ASS1*, *ARG1*, and  
221 *ORNT1/SLC25A15*) were highly expressed in the 3D PSC-hepatocytes (**Figure S6D**), and urea levels  
222 were higher in 3D PSC-hepatocytes than 2D PSC-hepatocytes (**Figure S6E**). Moreover, the 3D PSC-



223 hepatocytes increased expression of *INSR* and decreased expression of *IGF1R*, suggesting the 3D cells  
224 are better than 2D PSC-hepatocytes in studying metabolic effects of insulin signaling (**Figure S6F**).

225

226 In addition to protein-coding genes, we examined the enrichment of single nucleotide polymorphisms  
227 (SNPs, including non-coding SNPs) that are linked to liver-relevant diseases and traits in accessible  
228 chromatin regions of 2D-PSC-hepatocytes, 3D-PSC-hepatocytes, and primary hepatocytes. We applied  
229 stratified LD score regression (Finucane et al., 2018) to examine the summary statistics from 10 GWAS  
230 studies – ALP, ALT, AST, and GGT (Chambers et al., 2011); HDL, LDL, TC and TG (Willer et al., 2013);  
231 T2D and T2D stratified by body mass index (BMI)(Mahajan et al., 2018) and found that the enrichment of  
232 disease-associated SNPs in 3D PSC-hepatocytes was higher than those in 2D hepatocytes differentiation  
233 (**Figure 4F**). For T2D and BMI, the levels of enrichments in 3D PSC-hepatocytes and in primary  
234 hepatocytes were similar (**Figure 4F**), suggesting the 3D-PSC-hepatocytes could be used to study the  
235 disease-associated SNPs and the underlying mechanisms.

236

237 Furthermore, a common non-encoding SNP rs12740374 that regulated *SORT1* expression in  
238 hepatocytes by creating a C/EBP binding sites (Musunuru et al., 2010) and modulated plasma LDL-C  
239 levels was in an active ATAC-peak with H3K27Ac signals in 3D PSC-hepatocytes, similar to primary  
240 hepatocytes (**Figure 4G**). T3 treatment increased the expression and chromatin accessibility of *SORT1*  
241 (**Figure 4H-I**). Similarly, chromatin accessibility was increased for *CYP3A4* proximal enhancer, but  
242 reduced for *AFP* 3' region (**Figure 4H**). Additionally, T3 treatment improved H3K27Ac signals around  
243 rs12740374 (**Figure 4G**), and increased H3K27Ac signals of the *ONECUT1* and *NFIC* loci (**Figure 4J**).  
244 Analysis of super-enhancers also showed that T3 treated 3D-PSC-hepatocytes were more similar to  
245 primary hepatocytes than control 3D-PSC-hepatocytes (**Figure 4K**). These changes associated with  
246 hepatocytes maturation, together with extensive overlapping of THRB ChIP-seq peaks and ATAC-seq  
247 peaks (**Figure 3D**) indicate that the supplementing T3 could improve overall maturation status of PSC-  
248 hepatocytes.

249

250 To start examining the mechanisms by which THRB mediated the epigenetic changes, we performed  
251 immunoprecipitation (IP) of THRB in THRB-FLAG HepG2 cells with anti-FLAG antibody, followed by

252 mass-spectrometry to identify THR<sub>B</sub>-binding proteins (**Figure 5A**). Consistent with a previous study  
253 showing interaction between THR<sub>B</sub> and heterogeneous nuclear ribonuclearprotein hnRNP H1 (Uren et  
254 al., 2016), multiple hnRNPs were identified in the immunoprecipitation complex (**Figure 5B**), in addition to  
255 several transcription initiation factor TAF proteins. Furthermore, PBRM1/BAF180 and ARID2/BAF200, two  
256 defining components of the ATP-dependent chromatin remodeling complex pBAF (polybromo-associated  
257 Brg/Brahma-associated factors (BAF)) (Kadoch and Crabtree, 2015) were identified to be present in the  
258 immunoprecipitation complex. To verify the mass-spectrometry results, we performed IP-Western  
259 experiments, and confirmed that PBRM1 and ARID2 were co-immunoprecipitated with THR<sub>B</sub> (**Figure**  
260 **5C**). Furthermore, ARID2, loss-of-function, which has been frequently identified in hepatocellular  
261 carcinoma (Li et al., 2011), showed increased association to the IP-THR<sub>B</sub> complex in a T3 regulated  
262 manner (**Figure 5C**). These biochemical interactions between THR<sub>B</sub> and pBAF components, together  
263 with the effects of T3 on chromatin accessibility (**Figure 4H**), suggest that the pBAF complex could be  
264 involved in THR<sub>B</sub> mediated regulation of chromatin accessibility.

265

266 We also tested the 3D spheroids differentiation for additional human PSC cell lines (**Figure S7A-C**). Gene  
267 expression analysis on 3D-PSC-hepatocytes generated from a tdTomato-expressing iPS cells derived  
268 from a female Niemann-Pick disease type C (NPC) patient (Maetzel et al., 2014), a GFP-expressing male  
269 ES cell line HUES8-GFP (Ma et al., 2018), and a female ES cell line WIBR3 (Lengner et al., 2010)  
270 showed reduced fetal hepatocyte gene *AFP* when 3D-PSC-hepatocyte were treated with T3 compared to  
271 control (**Figure S7D-E**). In contrast, expression of mature hepatocyte gene *CYP3A4* and *NFIC* were  
272 upregulated under this condition (**Figure S7E**) in the hPSCs. These results from different PSCs from  
273 different sources demonstrated that this approach supported differentiation of multiple hPSC lines  
274 including patients' iPS cells to more mature hepatocytes.

275

### 276 **Engraftment of hPSC-hepatocytes to the undamaged liver of immunocompromised mice**

277 Since hepatocytes maturity is related to the capacity to engraft into liver upon transplantation (Hu et al.,  
278 2018), we tested the *in vivo* function of the PSC-differentiated hepatocytes by transplanting the cells into  
279 immunocompromised mice. Transplantation of human hepatocytes or human cells derived hepatocytes  
280 have been performed in immunocompromised mice with liver injuries to facilitate engraftment of human

281 cells(Azuma et al., 2007; Carpentier et al., 2014; Hu et al., 2018; Michailidis et al., 2020; Xie et al., 2019).  
282 Here, we tested if PSC-differentiated hepatocytes in 3D could be engrafted in undamaged mouse liver by  
283 injecting dissociated cells into the spleen of NOD.Cg-Prkdcscid Il2rgtm1Wjl/SzJ (NSG) mice (**Figure 6A**).  
284 H&E histology staining showed that liver histology of transplanted mice both 1 month post transplantation  
285 and 6 months post transplantation were similar to control mice (**Figure 6A**). However, anti-human-  
286 Albumin antibody IHC detected engrafted human cells with hepatocyte morphology integrated to the  
287 mouse liver parenchyma (**Figure 6B**). Furthermore, immunofluorescence staining showed that 1 month  
288 after transplantation, PSC-hepatocytes expressing human ALB and CYP3A4 could be found in liver of  
289 transplanted mice (**Figure 6C**). At 6 months post transplantation, human albumin expressing hepatocytes  
290 could be detected to integrate with mouse liver parenchyma (**Figure 6D**). We extracted DNA from tissue  
291 slides and performed q-PCR analysis and detected human mitochondrial DNA (**Figure 6E**), consistent  
292 with the presence of human hepatocytes in the transplanted mouse liver. These data show that that 3D  
293 PSC differentiated hepatocytes can engraft into undamaged liver of immunocompromised mice and  
294 integrate into the liver parenchyma without disrupting the normal histology of the liver.

295

## 296 **Discussion**

297 In this study, we compared genome-wide maps of gene expression and cis-regulatory elements of PSC-  
298 hepatocytes with that of primary non-cultured hepatocytes. Modulating thyroid hormone signaling,  
299 contributed to the generation of more mature human hepatocytes. THRB regulated *CYP3A4* expression  
300 by binding to enhancer elements through ligand-regulated binding and activation. The PSC-hepatocytes  
301 not only expressed critical hepatocyte genes, but also showed activation of disease associated non-  
302 coding SNPs. Upon transplantation to uninjured liver of immunocompromised mice, these PSC-  
303 hepatocytes integrated into mouse liver parenchyma without disrupting normal liver histology for up to 6  
304 months after transplantation. These data suggest that PSC-hepatocytes could be used to study  
305 expression and regulatory mechanism of hepatocyte genes implicated in hepatocyte development and  
306 liver disease. In addition, these PSC-derived hepatocytes may be useful for cell replacement therapies.  
307  
308 Our results are consistent with the critical role of thyroid hormone signaling for liver physiology.  
309 Hypothyroidism has been connected with hyperlipidemia(Willard et al., 2014), and T3 treatment was

310 reported to improve liver dysfunction associated with congenital hypothyroidism(Mantri et al., 2016).  
311 Improved H3K27Ac signals upon T3 treatment may reflect recruitment of histone acetylase p300/CBP to  
312 nuclear hormone receptors (Ogryzko et al., 1996). It is possible that thyroid hormone receptors recruit  
313 pBAF to regulate chromatin accessibility through nucleosome repositioning or ejection (Clapier et al.,  
314 2017), similar to vitamin D receptors that switch pBAF complex for BAF complex in pancreatic  $\beta$  cells  
315 (Wei et al., 2018). The thyroid hormone signaling is regulated at multiple levels including expression of  
316 thyroid hormone transporter proteins and T3 metabolizing enzymes such as iodothyronine deiodinases.  
317 Although the effects of thyroid hormones could be context depended, our results suggested the critical  
318 functions of thyroid hormone signaling in promoting maturation of human PSC-differentiated hepatocytes.  
319 Based on the conserved functions of thyroid hormones in regulating organ development (Brent, 2012),  
320 and the surge of thyroid hormone levels at and shortly after birth, T3 has been tested empirically to  
321 improve maturation of iPS differentiated hepatocytes in 2D culture (Bogacheva et al., 2021). Our  
322 unbiased transcriptome and epigenome study using 2D and 3D differentiations identified that thyroid  
323 hormone signaling accounted for a significant portion of the immaturity phenotype of hepatocytes  
324 differentiated from hPSC *in vitro*. Furthermore, we provided evidence suggesting that THRB could bind  
325 the chromatin remodeling complex pBAF, a potential mechanism by which THRB could mediate  
326 chromatin accessibility changes of gene regulatory elements. The environmental factors-nuclear  
327 receptors axis could regulate maturation of additional cell types differentiated from human PSCs.  
328  
329 Future studies using 3D chromosome conformation capture methods and single cell genomics and  
330 epigenomics approaches on the PSC-hepatocytes could further provide insights into the developmental  
331 and maturation processes of human hepatocytes. Furthermore, scaling up PSC-hepatocytes  
332 differentiation with bioreactors and potentially microencapsulation, modulating additional nuclear  
333 receptors signaling pathways to further improve functional maturation of PSC-hepatocytes, and  
334 expansion of the PSC-hepatocytes *in vitro* and *in vivo* in immunocompromised mice with liver damages  
335 could be future studies.

336

337 **Methods**

338

### 339 **Primary human liver tissue sections**

340 Formalin-fixed paraffin-embedded (FFPE) slides (5-micron sections) from a normal adult human liver  
341 were obtained from Biomax (HuFPT074 SB, male, 45 years old). The antigen retrieval and  
342 immunofluorescence staining procedures were performed with a modified protocol (Li et al., 2014).  
343 Briefly, after deparaffinization and rehydration, the FFPE slides were subjected to antigen retrieval with  
344 citrate buffer (10 mM, pH 6.0). Then the tissue slides were blocked in PBST (PBS with 0.1% Tween-20)  
345 and 5% donkey serum (Jackson Laboratories 017-000-121) for 2 hours at room temperature, followed by  
346 primary antibodies (1:100 mouse-anti-CYP3A4 antibody Life Technologies MA5-17064, 1:100 goat-anti-  
347 hALB antibody, Bethyl Laboratories A80-229A, diluted in PBST with 5% donkey serum) incubation at 4 °C  
348 for overnight. After four times washing with PBST for 10 minutes each at room temperature, secondary  
349 antibodies (Alexa Fluor 647 conjugated donkey anti-goat IgG secondary antibody Life Technologies  
350 A21447 and Alexa Fluor 594 conjugated donkey anti-mouse IgG secondary antibody Life Technologies  
351 A21203, 1:400 diluted in PBST with 5% donkey serum) were added for incubation at room temperature  
352 for 1 hour. After four times washing with PBST for 10 minutes each, DAPI staining was for 10 minutes at  
353 room temperature followed by rinsing with PBST for 3 times. After mounting with Fluoromount-G  
354 mounting medium (Electron Microscopy Sciences 1798425), the slides were imaged with a Zeiss LSM  
355 710 confocal microscope.

356

### 357 **Primary human hepatocytes**

358 Frozen primary human hepatocytes from healthy donors were purchased from Biolvt (Catalog number  
359 M00995-P, lot: SMC and AQL). After thawing in a 37 °C water bath, the hepatocytes were washed with  
360 Cryopreserved Hepatocyte Recovery Medium (CHRM, Thermo Fisher Scientific, CM7000). RNA from  
361 about 0.5 million cells were purified with RNeasy Plus Micro (QIAGEN). Around 50,000 cells were washed  
362 with PBS and subjected to tagmentation and ATAC-seq described below. About 5-10 million cells were  
363 crosslinked with 1% formaldehyde for ChIP-seq described below.

364

### 365 **Culture of human PSCs**

366 Matrigel coated tissue culture plates were used for feeder-free culture of human PSCs. For coating  
367 plates, Matrigel (Corning) was 1:100 diluted in cold DMEM-F12 medium, and 2 ml of diluted Matrigel

368 solution was added to one well of a 6-well plate well, and coat for overnight at room temperature before  
369 pre-warming in a 37 °C incubator for 1 hour prior to plating cells. Human PSCs H1-OCT4-GFP(Zwaka  
370 and Thomson, 2003), H1-OCT4-GFP AAVS1:tdT(Ma et al., 2018), HUES8-GFP(Ma et al., 2018), and  
371 INS:tdT(Ma et al., 2018) were cultured in mTeSR medium (STEMCELL Technologies) in Matrigel coated  
372 6-well plates, and passaged every 3-4 days with a 1:4-6 passage ratio using Versene solution (Life  
373 Technologies 15040066).

374

375 WIBR3(Lengner et al., 2010) and Niemann-Pick disease type C (NPC1) iPS (clone 16-13(Maetzel et al.,  
376 2014)) were initially cultured on mitomycin C inactivated mouse embryonic fibroblasts (MEFs) feeder cells  
377 using DMEM-F12 (Life Technologies cat# 11330-057) supplemented with 15% FBS (Hyclone  
378 SH30396.03), 5% KSR (Life Technologies cat# 10828-028), 4 ng/ml FGF (Life Technologies cat#  
379 PHG0261), 0.1 mM 2-mercaptoethanol (Life Technologies cat #21985-023), 1X L-glutamine (Life  
380 Technologies cat# 25030-081), 1X MEM-NEAA (Life Technologies cat# 11140-050), 1X  
381 penicillin/streptomycin (Life Technologies cat# 15140-122). Cells were passaged with 1 mg/ml  
382 collagenase IV (Life Technologies cat# 17104019) every 4-6 days on inactivated MEF feeders. All human  
383 PSCs were routinely tested negative for mycoplasma.

384

### 385 **Genetic modification of human PSCs**

386 NPC-iPS cells (clone 16-13(Maetzel et al., 2014)) were targeted with AAVS1-tdTomato (Addgene  
387 159275) as described before(Ma et al., 2018). Briefly, NPC-iPS cells were treated with 10 µM Rho kinase  
388 inhibitor Y-27632 overnight before dissociated to single cells with Accutase (Stem Cell Technology  
389 07922). About 10 million cells were electroporated with 10 µg of AAVS1 zinc finger nuclease-encoding  
390 plasmid and 30 µg of AAVS1-tdTomato with one electroporation of 250 V, 500 µF using a Gene Pulser  
391 Xcell System (Bio- Rad), and plated on DR4 MEFs in PSC medium with 10 µM Y-27632 during the first  
392 day. Puromycin (0.5 µg/mL) selection was added 3–4 days after electroporation to select resistant cells.  
393 The tdTomato-expressing clones were manually passed to inactivated MEF feeders plated in 12-well  
394 plates in regular PSC medium without puromycin.

395

396 DOX-inducible CRISPR-activation cells were generated based on the INS:tdT reporter H1 cells(Ma et al.,  
397 2020) first by removing the floxed puromycin resistant cassette by transient expression of Cre. About 3  
398 million Y-27632 pretreated H1-INS:tdT PSC cells were electroporated with 5 µg CAGGS:Cre-tdT under  
399 electroporation condition stated above and plated in mTeSR medium supplemented with 10 µM Y-27632  
400 in Matrigel coated plates. One day after electroporation, tdTomato-expressing cells were isolated by  
401 fluorescence activated cell sorting (FACS) using a FACSAria cell sorter (BD Biosciences) and plated  
402 sparsely on Matrigel coated plates in mTeSR and 10 µM Y-27632. Individual clones were plated in 12-  
403 well plates and puromycin-sensitive clones were expanded and targeted with an AAVS1-DOX inducible  
404 CRISPR activation plasmid. Puromycin (0.5 µg/mL) resistance clones were isolated after targeting.  
405 Isolated clones were characterized by Southern blotting using the *AAVS1* probes as described before(Ma  
406 et al., 2020), and properly targeted cells were expanded.

407  
408 HEK293T cells were cultured in HEK293 medium (DMEM supplemented with 10% FBS, 1X L-glutamine,  
409 1X MEM-NEAA, 1X penicillin/streptomycin), and passaged with trypsin-EDTA. Lentiviruses delivering  
410 sgRNA were packed by transfecting about 70% confluent HEK293T cells cultured in T75 flasks with 5 µg  
411 pCMV-VSVG (Addgene 8454), 10 µg pCMV-dR8.2 dvpr (Addgene 8455), and 10 µg sgRNA plasmid  
412 using X-tremeGENE™ 9 DNA transfection reagent (Roche 06365809001). One day after transfection,  
413 medium was changed to HEK293T culture medium. Media were changed daily, and the conditioned  
414 media were collected for 2-3 days, filtered through 0.45 µm filters and ultracentrifuged (23000 rpm at 4 °C  
415 for 1 hour 45 minutes) with a Beckman Optima XE-90 ultracentrifuge. Centrifuged pellets were  
416 resuspended in 500 µL PBS overnight at 4 °C. For lentiviral transduction, DOX-inducible CRISPR  
417 activation H1 cells were pretreated with 10 µM Y-27632 overnight, then single cell dissociated with  
418 Accutase, and plated in Matrigel-coated 6-well plates in 2 ml mTeSR medium supplemented with 10 µM  
419 Y-27632, and 20 µL CRISPR activation sgRNA virus stock. After 1 day, the medium was changed to  
420 mTeSR medium. Zeocin selection (0.2 mg/mL) was started after another 2 days for about 3-5 days.  
421 Zeocin resistant cells were passaged 1:4 in mTeSR medium with zeocin for about 1 more week. The cells  
422 were expanded in mTeSR for differentiation.

423

424 **Differentiation of human pluripotent stem cells (PSCs) to hepatocytes-like cells**

425 WIBR3 cells and NPC-iPS-tdT cells were adapted to feeder culture with mTeSR1 medium by manual  
426 passaging. Cells were differentiated to hepatocyte-like cells after 3-6 passages in mTeSR medium.

427

428 All feeder-free human PSCs were thawed in mTeSR1 medium, and cultured as described before. Cells  
429 were typically differentiated within 3 passages after thawing.

430 For 2D differentiation of H1-OCT4-GFP cells, less than 60% confluent PSCs were treated with mTeSR1  
431 medium supplemented with 10  $\mu$ M Y-27632 for overnight or for 4-6 hours and the cells were dissociated  
432 into single cells with Accutase for about 5 min at 37°C by gentle pipetting in mTeSR1 medium. After cell  
433 counting with Countess (Invitrogen), about 1.4-1.6 million live cells were plated to each well of a 6-well  
434 Matrigel-coated plates in mTeSR medium supplemented with 10  $\mu$ M Y-27632 and distributed evenly.

435 After 1 day when plated cells were about 80-90% confluent, differentiation was initiated by removing  
436 mTeSR medium, washing cells with DMEM/F12, and followed by daily media changes (stages and days  
437 are referred by S and D, respectively):

438 Day 1 (S1D1): MCDB131 medium with 10mM Glucose, 1.5 g/L NaHCO<sub>3</sub>, 0.5 % FAF- BSA, 1x Glutamax,  
439 1x penicillin/streptomycin, 100 ng/ml activin, and 3  $\mu$ M Chir99021.

440 Day 2 (S1D2): MCDB131 medium with 10mM Glucose, 1.5 g/L NaHCO<sub>3</sub>, 0.5 % FAF- BSA, 1x Glutamax,  
441 1x penicillin/streptomycin, 100 ng/ml activin, and 0.3  $\mu$ M Chir99021.

442 Day 3 (S1D3): MCDB131 medium with 10mM Glucose, 1.5 g/L NaHCO<sub>3</sub>, 0.5 % FAF- BSA, 1x Glutamax,  
443 1x penicillin/streptomycin, and 100 ng/ml activin.

444

445 Day 4-8 (S2D1-S2D5): Cells were washed with PBS on S2D1 before changing to RPMI-1640 medium  
446 with 1x glutamax, 1x NEAA, 1x penicillin/streptomycin, 1x B27, 10 ng/ml FGF2, and 20 ng/ml BMP4.

447

448 Day 9-13 (S3D1-S3D5): RPMI-1640 medium with 1x glutamax, 1x NEAA, 1x penicillin/streptomycin, 1x  
449 B27, and 20 ng/ml HGF.

450

451 Day 14-18 (S4D1-S4D5): William E medium supplemented with 1x glutamax, HCMTM SingleQuots Kit  
452 (no EGF was added), trace element A (500 mL), trace element B (500 ml), 100 nM dexamethasone, 5.35  
453 mg/mL linoleic acid, 20 ng/ml HGF, and 20 ng/ml Oncostatin M.



454

455 For 3D spheroid differentiation of H1-OCT4-GFP cells, cells plating and media changes for the first 3 days  
456 were the same as described above. After S1D3, the following media changes were used:

457 Day 3-5 (S2D1-D2D2): S1D3 cells were washed with PBS before changing to S2 medium: MCDB131 with  
458 0.5% FAF-BSA, 1.5 g/L NaHCO<sub>3</sub>, 10 mM glucose, 1x penicillin/streptomycin, 1x glutamax, 0.25 mM  
459 vitamin C, and 50 ng/ml KGF.

460

461 Day 6 (S3D1): RPMI-1640 medium with 1x glutamax, 1x NEAA, 1x penicillin/streptomycin, 1x B27 (1:50),  
462 50 µg/ml heparin, 10 ng/ml FGF2, and 20 ng/ml BMP4.

463

464 Day 7-10 (S3D2-S3D5): After about 1 day incubation in S3D1, 10 µM Y-27632 was added to the medium  
465 for about 4-6 hours. Then cells were washed with PBS, and dissociated with Accutase for about 5 min at  
466 37 °C. Then cells were washed with RPMI-1640 medium with 1x glutamax, 1x NEAA, 1x  
467 penicillin/streptomycin, 1x B27, and 1% BSA-fragment V. Approximately 2 million live cells were plated in  
468 4 ml S3 medium (RPMI-1640 medium with 1x glutamax, 1x NEAA, 1x penicillin/streptomycin, 1x B27, 10  
469 ng/ml FGF2, and 20 ng/ml BMP4 supplemented with 10 µM Y-27632 in each well of 6-well AggreWell 400  
470 plates (Stem Cell Technology, 34415). Next day the formed cell spheroids clusters were washed with  
471 RPMI-1640 medium with 1x glutamax, 1x NEAA, 1x penicillin/streptomycin, 1x B27, and moved to 6-well  
472 ultralow adherent culture plates placed on an orbital shaker set at 95-100 rpm for 4-5 more days in S3  
473 medium with daily media change. The rest of the differentiation were carried out in ultralow attachment  
474 plates placed on an orbital shaker with the same setting. During this and later steps, cystic spheroids and  
475 aggregated spheroids were removed daily.

476

477 S4 (about 2-3 weeks): William E medium supplemented with 1x glutamax, HCMTM SingleQuots Kit (no  
478 EGF was added, and 5 µL insulin was used for 500 mL medium), trace element A (500 µL), trace element  
479 B (500 µL), 100 nM dexamethasone, 100 nM gamma secretase inhibitor XX, 20 µM forskolin, 1 µM TGFβ  
480 inhibitor A8301, 5.35 µg/mL linoleic acid, 20 ng/ml HGF, and 20 ng/ml Oncostatin M. N-acetyl cysteine (1  
481 mM) was added to the later part of S4 as needed to maintain culture health. Media were changed every 2  
482 days.

483

484 S5 (about 1-2 weeks): William E medium supplemented with 1x glutamax, HCMTM SingleQuots Kit (no  
485 EGF was added, and 5  $\mu$ L insulin was used), trace element A (500  $\mu$ L), trace element B (500  $\mu$ l), 100 nM  
486 dexamethasone, 100 nM gamma secretase inhibitor XX, 20  $\mu$ M forskolin, 1  $\mu$ M TGF $\beta$  inhibitor, 5.35  
487  $\mu$ g/mL linoleic acid, 20 ng/ml HGF, 3  $\mu$ M T3, and 1 mM N- acetylcysteine. Media were changed every 2  
488 days.

489

490 Cell growth state and density optimizations are needed for proper differentiation. Representative Q-RT-  
491 PCR results during the differentiation are show in Extended Data Fig. 9b.

492

493 For DOX-induction experiments, DOX-inducible CRISPR activation H1 cells were differentiated as above,  
494 and DOX (final concentration: 2 mg/ml) was added from S4D12 to S4D14. RNA samples were purified  
495 with RNeasy Plus Micro Kits (Qiagen) for q-PCR analysis (described later) using *ACTB*, *CYP3A4*, *ALB*  
496 and *cas9* primers.

497

498 For differentiating additional PSCs, the following seeding density and KGF concentrations for S2 were  
499 used: HUES8-GFP (1.4-1.6 million cells per 6-well plate well, 10 ng/ml KGF for S2), NPC-iPS-tdT (1.8-2  
500 million cells per 6-well plate well, 5 ng/ml KGF for S2), WIBR3 (1.3-1.5 million cells per 6-well plate well,  
501 10 ng/ml KGF for S2).

502

### 503 **Culture of THRB-FLAG HepG2 cells and deletion of *CYP3A4* proximal enhancer**

504 THRB-FLAG HepG2 cells were maintained in DMEM with 10% FBS, 1x penicillin/streptomycin, 1x MEM-  
505 NEAA, 1% glutamax. Cells were passaged 1:4-1:6 about twice a week. THRB-FLAG HepG2 cells were  
506 routinely tested negative for mycoplasma.

507

508 To generate THRB-FLAG HepG2 cells with *CYP3A4* proximal enhancer deleted, 1  $\mu$ g of 330-cherry-  
509 *CYP3A4* enhancer-L-sgRNA, and 1  $\mu$ g of 330-BFP-*CYP3A4*-enhancer-R-sgRNA were transfected with X-  
510 tremeGENE 9 DNA transfection reagent (Roche 6365809001). After 3-5 days, transfected cells were  
511 dissociated to single cells with Trypsin-EDTA, and cells with high expression of both cherry and BFP were

512 isolated with fluorescence activated cell sorting with a FACSAria cell sorter (BD Biosciences). Clones  
513 grown from sorted cells were expanded and DNA samples from individual clones were extracted with  
514 Lucigen quick DNA buffer (68 °C for 15 min followed by 98 °C for 2 min), and genotyped by PCR with  
515 primers (F: GGTCCCCTTGGAACCTTCATGC, R: CCTTCAACAACCTAATAGCAGGG) with 2x KAPA HiFi  
516 HotStart ReadyMix (Roche) using the following PCR program (95 °C for 3 min; then 35 cycles of 98°C for  
517 20 sec, 58°C for 15 sec, 72 °C for 30 sec; then 72 °C for 5 min). Control cells showed amplicon of about  
518 0.5 kb, and clones with enhancer deletion showed amplicon of about 0.2 kb. PCR amplicons were  
519 sequenced by Sanger sequencing and clones with confirmed homozygous disruption of *CYP3A4*  
520 proximal enhancer were kept.

521

### 522 **Nuclear receptor ligands treatment and CYP3A4 activity measurements**

523 For nuclear receptor ligands treatment, cells were cultured in William E medium supplemented with 1x  
524 glutamax, HCMTM SingleQuotes Kit (no EGF was added, and 5 microliters of insulin was used for 500 ml  
525 medium), trace element A (500 µL), trace element B (500 µL), 5.35 µg/mL linoleic acid with different  
526 concentration of T3 (3nM-10µM) or retinoic acid (20 nM-1µM). For thyroid hormone antagonist  
527 experiments, a final concentration of 3 µM antagonist (1-850) was used with 3 nM T3.

528

529 For measuring CYP3A4 activity with CYP3A4 P450-Glo (Promega), IPA-luciferin was diluted 1:1000 in  
530 William E medium supplemented with 1x glutamax, HCMTM SingleQuotes Kit (no EGF was added, and 5  
531 microliters of insulin was used for 500 ml medium), trace element A (500 µL), trace element B (500 µL),  
532 5.35 µg/mL linoleic acid and incubated in a 37 °C cell culture incubator. After 2 hours, 50 µL conditioned  
533 medium from each sample was mixed with 50 µL reconstituted luciferin detection reagent in a white  
534 opaque 96-well plate and incubated at room temperature for 20 min before data collection with a  
535 SpectraMax microplate reader (Molecular Devices).

536

### 537 **Transfection of THRB-FLAG-HepG2 cells with esiRNA**

538 About 0.1-0.2 million THRB-FLAG HepG2 cells were plated in each well of a 24-well plate in 500 µL  
539 DEME medium with 10% FBS. The next day, control (SIC001, Millipore Sigma) or esiRNA targeting  
540 *THRB* (EHU083461, Millipore Sigma) were transfected using Lipofectamine RNAiMAX Transfection

541 Reagent (Invitrogen) in 100  $\mu$ L Opti-MEM medium with final concentration of 30 nM. After 2 days, media  
542 were removed and washed with PBS, and 500  $\mu$ L William E base medium with 3 nM T3 or control were  
543 added. After 1 day, CYP3A4 luciferase experiments were performed as described above.

544

#### 545 **Cut-and-qPCR experiments**

546 About 70% confluent FLAG-THRB HepG2 cells cultured in 6-well plates were washed with PBS, and  
547 changed to William's E base medium with or without 3 nM T3. After 1-2 days, cells were dissociated to  
548 single cells with trypsin, and 250,000 cells were used for each experiment based on the protocol (Skene et  
549 al., 2018). Specifically, buffers with 0.025% digitonin was used. Primary antibody (1  $\mu$ g rabbit-anti-FLAG,  
550 Sigma F7425) or rabbit normal serum were incubated for 2 hours at 4  $^{\circ}$ C. After washing, 0.5  $\mu$ L pA-MN (a  
551 gift generously provided by Dr. S Henikoff) was added to incubate at room temperature for 10 min.  
552 Cutting experiments were performed at 0  $^{\circ}$ C ice-water bath with 50  $\mu$ L buffer with CaCl<sub>2</sub> for 30 min. Then  
553 34  $\mu$ L stop buffer were added and incubated at 37  $^{\circ}$ C for 15 minutes. DNA from collected supernatant  
554 were purified with ChIP DNA concentration and cleaning kit (Zymo D5205) and eluted in 20  $\mu$ L elution  
555 buffer. For DNA input, 500,000 cells were used for genomic DNA purification with blood and tissue DNA  
556 kit (Qiagen 69504). Quantitative PCR experiments were performed with fast SYBR Green Master Mix  
557 (Thermo Fisher Scientific 4385618) with the *CYP3A4* proximal enhancer primers (F:  
558 CTTGCTGACCCTCTGCTTTCC; and R: CTCATGAGGCTGCTTGAACCG). Relative enrichment is  
559 calculated by normalization with input DNA.

560

#### 561 **Immunoprecipitation, mass-spectrometry and Western blotting**

562 THRB-FLAG-HepG2 cells were cultured in 10-cm cell culture plates in DMEM with 10% FBS, 1x  
563 penicillin/streptomycin, 1x MEM-NEAA, 1% glutamax. Cells, about 50-70% confluent, were washed with  
564 PBS, and 10 ml William's E medium was added for 1-2 days. Then the cells were washed with PBS, and  
565 collected with 500  $\mu$ L NP40 buffer (1% Nonidet P-40 (Igepal A-680), 50 mM Tris-HCl (pH 7.4), 150 mM  
566 NaCl, 2 mM EDTA, 50 mM NaF, 10 Glycerol 10 %, with freshly supplemented protease inhibitors (Roche  
567 04693159001)). Cell lysates were collected, incubated at 4  $^{\circ}$ C for 30 min, passed through 1 ml syringe with  
568 23G needle 10 times. Then spun at 14,000 rpm for 5 min. Then the pellets were ground for about 2 min,  
569 spun at 14,000 rpm for 5 min. The nuclear fraction and supernatant fraction (800  $\mu$ L) were collected, and 8

570  $\mu\text{g}$  rabbit-anti-FLAG antibody (Sigma F7425), or about 8  $\mu\text{g}$  rabbit control serum were added to incubate  
571 overnight at 4 °C. The clear lysates were incubated with 100  $\mu\text{L}$  protein G dynabeads (Thermo Fisher  
572 10003D) for 2 hours at 4°C. Pellets were washed 4 times with NP40 buffer.

573 For mass-spectrometry, the dynabeads samples were washed and resuspended in a Tris/ Urea buffer,  
574 reduced with dithiothreitol, alkylated with iodoacetamide and digested with trypsin at 37 °C overnight. This  
575 solution was subjected to solid phase extraction to concentrate the peptides followed by injection onto a  
576 Thermo EASY-nLC 1200 HPLC equipped with an EASY-Spray ES900 3  $\mu\text{m}$  C18 analytical column 0.075  
577 mm by 15 cm, (Thermo). Peptides were eluted using standard reverse-phase gradients. The effluent from  
578 the column was analyzed using a Thermo Exploris 480 mass spectrometer (nanospray configuration)  
579 operated in a data dependent manner for the 90 minutes. The resulting fragmentation spectra were  
580 correlated against the Refseq entries for homo sapiens using PEAKS Studio X+ (Bioinformatic Solutions)  
581 and to provide consensus reports for the identified proteins.

582

583 Western blotting was performed with a rabbit anti-PBRM1 antibody (Bethyl Laboratories A301-591A,  
584 1:2000), a rabbit anti-ARID2 (Cell Signaling Technology 82342S 1:1000), or a mouse anti FLAG antibody  
585 (Sigma F1804 1:4000) based on previous methods (Wu et al., 2007).

586

#### 587 **RNA purification and quantitative RT-PCR**

588 PSC hepatocytes spheroids were washed with PBS, then lysed in RLT plus buffer from Qiagen RNeasy  
589 plus micro kit for about 15-20 min at room temperature followed by RNA purification. Reverse  
590 transcription was performed using by adding 1.5  $\mu\text{L}$  q-crypt to 6  $\mu\text{L}$  RNA, and the reaction was carried out  
591 at 25 °C for 5 min, 42 °C for 30 min, 85 °C for 5 min. Quantitative PCR experiments were performed with  
592 SYBR Green Master Mix reagent with a QuantStudio 6 Flex Real-Time PCR System (Applied  
593 Biosystems). Relative quantifications were determined with the above primer pairs using delta delta  
594 threshold cycle methods with the following primers:

| Target        | Forward (5'-3')          | Reverse (5'-3')           |
|---------------|--------------------------|---------------------------|
| <i>ACTB</i>   | CATGTACGTTGCTATCCAGGC    | CTCCTTAATGTCACGCACGAT     |
| <i>CYP3A4</i> | TTGAGTCAAGGGATGGCACCGTAA | TCTCTGGTGTTCCTCAGGCACAGAT |

|                                   |                         |                         |
|-----------------------------------|-------------------------|-------------------------|
| <i>ALB</i>                        | TGCAACTCTTCGTGAAACCTATG | ACATCAACCTCTGGTCTCACC   |
| <i>AFP</i>                        | CTTTGGGCTGCTCGCTATGA    | GCATGTTGATTTAACAAGCTGCT |
| <i>NFIC</i>                       | CAGAGCAAAGCGGCAGTC      | TCTCCTGGAAGTCGGTCGTGT   |
| <i>PDX1</i>                       | CCTTTCCCATGGATGAAGTCTAC | TTCAACATGACAGCCAGCTCC   |
| <i>Cas9</i>                       | AAACAGCAGATTCGCCTGGAC   | TCATCCGCTCGATGAAGCTC    |
| Ultra conserved Mitochondrial DNA | AACAATGGGTTTCAGCTGCTT   | CCCAGGCGTATTTTTGTTCT    |
| Human mitochondria DNA            | AATATTAACACAACTACCTACCT | TGGTTCTCAGGGTTTGTATAA   |

595

## 596 **RNA-seq and analysis**

597 RNA samples from freshly thawed human primary hepatocytes (SMC and AQL) or from PSC-hepatocytes  
 598 were prepared with RNeasy plus micro kit (Qiagen), and 10-20 ng total RNA samples were used for  
 599 constructing stranded RNA libraries with Swift RNA-seq library preparation kit and sequenced with an  
 600 Illumina HiSeq 2500 sequencer with 50 base single end reads.

601

602 Human fetal liver RNA-seq (GEO accession ID: GSM3067803) was processed with RNA-seq results  
 603 generated in this study. Briefly, RNA-seq reads were aligned to human (GRCh38) genome using  
 604 STAR(Dobin et al., 2013) V2.7.1a. Gene counts were obtained using featureCounts(Liao et al., 2014) ,  
 605 and differentiation expression analyses were performed using DEseq2(Love et al., 2014). Enhanced  
 606 volcano plots were generated in RStudio. Gene set enrichment analyses were performed using  
 607 GSEA(Subramanian et al., 2005) 4.0.1, and KEGG pathway enrichment analyses were performed using  
 608 g:profiler (<https://biit.cs.ut.ee/gprofiler/>). BAM files were converted to normalized Bigwig files using  
 609 bamCoverage from deepTools(Ramirez et al., 2014) for visualization on a customized UCSC genome  
 610 browser(Kent et al., 2002) session.

611

## 612 **Tn5 tagmentation for ATAC-seq**

613 About 60-80 spheroids were washed with PBS, and dissociated with Accutase for about 20-25 min with  
614 gentle agitation in a 37 °C water bath. Then cells were gently pipetted, and washed with William's E  
615 medium with 1% BSA-fragment V. After counting, 50,000 cells were centrifugate for 5 min at 500 RCF.  
616 Then the cells were washed with 50 µL cold PBC at 4°C for 500 RCF for 5 min. After removing PBS, 50  
617 µL cold cell lysis buffer (for 300 µL cell lysis buffer: add 291 µL cell resuspension buffer (500 µL tris-HCl,  
618 pH7.5; 125 µL 4M NaCl, 150 µL 1M MgCl<sub>2</sub>, 49.25 ml autoclaved water), 3 µL 10% NP40 (Roche  
619 11332473001), 3 µL 10% Tween-20 (Roche 11332465001), freshly add 3 µL 1:1 water diluted digitonin  
620 (Promega G9441)) was added, and mixed for about 10 times, and samples were placed on ice. After 3  
621 min, 1000 µL wash buffer (990 µL resuspension buffer, 10 µL 10% Tween-20) was added, and samples  
622 were centrifugated at 500 RCF for 10 min at 4 °C. The clear supernatants were carefully removed with the  
623 pellets intact, then 50 µL tagmentation mixture (25 µL tagmentation buffer (Illumina 15027866), 16.5 µL  
624 PBS, 0.5 µL Tween-20, 0.5 µL 1:1 water diluted digitonin, 2.5 µL Tn5 transposase (Illumina 15027865), 5  
625 µL H<sub>2</sub>O) was added to each sample, and placed in a preheated 37 °C thermomixer set to 1000 rpm. After  
626 30 min, the samples were placed on ice, and immediately followed by DNA extraction with MinElute kit  
627 (Qiagen). DNA samples were kept at a -80 °C freezer before library preparation. ATAC-seq samples for  
628 human primary hepatocytes were performed according to the procedures described above on about  
629 50,000 freshly thawed primary hepatocytes.

630

## 631 **ATAC-seq, and analyses**

632 Library were prepared based on previous method(Buenrostro et al., 2013). After amplifying ATAC-seq  
633 library of the specific cycles based on q-PCR measurements, the libraries were double-side selected (0.5-  
634 1.3x) with SPRI beads (Beckman), followed by 1x selection to remove primer dimers and sequenced on a  
635 Hi-seq 2500 equipment with 60 bp paired-end sequencing.

636

637 After removing adaptors with cutadapt (cutadapt -a CTGTCTCTTATA), ATAC-seq results were aligned to  
638 Hg38 with bowtie2 (using "--very-sensitive --no-discordant -X 2000"). The generated SAM filers were  
639 converted to BAM files, sorted, and indexed using samtools. Bigwig files were generated from BAM files  
640 with bamCoverage (-of bigwig), and peak visualizations were performed in a customized session of

641 genome browser(Kent et al., 2002). The total number of reads were obtained with “samtools view -c”, and  
642 reads mapped to mitochondrial genomes were removed with “samtools view | grep -v chrM”. PRC  
643 duplicates were removed with picard tools (“MarkDuplicates REMOVE\_DUPLICATES=true  
644 VALIDATION\_STRINGENCY=LENIENT”), and properly paired reads were obtained with samtools  
645 (“samtools view -h -b -F 1804 -f”). Then reads were shifted (+4 for the forward strand, -5 for the reverse  
646 strand) by deeptools (“alignmentSieve --numberOfProcessors 8 --ATACshift”), and blacklist  
647 (hg38.blacklist.bed.gz) were used to filter unspecific reads. Post alignment quality controls were  
648 performed with ATACseqQC. TSS enrichment scores were calculated with Encode ATAC-seq pipeline  
649 (caper run atac.wdl). Fragment length were visualized with Picard CollectInsertSizeMetrics or deeptools  
650 bamPEFragmentSize, and reads enrichments were visualized with ngs.plots. ATAC-seq peaks were  
651 called with macs2(Zhang et al., 2008) (macs2 callpeaks -f BAMPE -q 0.001 --nomodel -g hs --keep-dup  
652 all --cutoff-analysis), and fraction of reads in peaks (FRiP) were performed with BEDTools(Quinlan and  
653 Hall, 2010) and SAMtools(Li et al., 2009) (bedtools sort -i peaks.narrowPeak| bedtools merge -i stdin |  
654 bedtools intersect -u -nonamecheck -a /final.shifted.bam -b stdin -ubam | samtools view -c). Motif  
655 analyses were performed using homer(Heinz et al., 2010) (findMotifsGenome.pl hg38 -size 200 -mask).  
656 The analyses of overlapping between THRB-FLAG ChIP-seq (peaks were called from GSM2534017  
657 using the ChIP-seq analysis methods described below) and ATAC-seq peaks were performed using  
658 BEDTools.

659

#### 660 **Chromatin accessibility measurements with ATAC-seq library and q-PCR.**

661 Control PSC-hepatocytes or T3 treated PSC-hepatocytes were tagmented, and tagmented DNA  
662 samples were purified and subjected to library preparation as described above. The amplified DNA were  
663 purified with MinElute purification kit (Qiagen), and DNA samples (about 0.5-1ng DNA for each sample)  
664 were subjected to q-PCR analysis with the following primers identified with ATAC-seq peaks.

665 A chromatin accessible peak at the *ACTB* locus: F: GCAAAGGCGAGGCTCTGTG; R:

666 CCGTTCCGAAAGTTGCCTTTTATG.

667 A chromatin accessible peak at the 3' of *AFP* locus: F: TTGAGGGAACGAAAGGGTGG; R:

668 TTGCCCATGCTCCGTATCTC.



669 The proximal enhancer of the *CYP3A4* locus: F: CTTGCTGACCCTCTGCTTTCC; R:

670 CTCATGAGGCTGCTTGAACCG.

671 A chromatin accessible peak encompassing the rs12740374 SNP: F:

672 GTTTGCTCAGTTGCTGACCCAAAAG; R: CCACATCACAGCAAAGAAGCGCAAC. The delta cT valued

673 (cT-*ACTB* cT) were used to compare control samples and T3 treated samples to quantify relative

674 chromatin accessibility.

675

### 676 **Formaldehyde crosslinking, chromatin sonication, H3K27Ac ChIP-seq, and analysis**

677 Crosslinking and ChIP-seq were performed as described (Lee et al., 2006) with modifications described

678 below. Formaldehyde buffer (11% formaldehyde (Tousimis 1008A), 0.5 mM pH8 EGTA, 1 mM pH8

679 EDTA, 100 mM NaCl, 50 mM pH7.5 HEPES-KOH) was added to cell culture plate at 1:10 ratio to PSC-

680 hepatocytes (2D) from about 4 6-well plates. Cells were crosslinked with for 10 min at room temperature

681 followed by 5 minutes quenching with glycine at room temperature. Cells were collected by scraping and

682 centrifuged for 5 min at 800 RCF at 4°C. After PBS wash twice, the cell pellets were flash frozen in liquid

683 nitrogen and stored in a -80 °C freezer until sonication.

684

685 PSC-hepatocytes spheroids were resuspended in 10 ml medium in a 15 ml conical tube, and 1 ml

686 crosslinking solution was added, and the tube was put on a 70 rpm horizontal rocker for 10 min at room

687 temperature. Then 0.5 ml 2.5 M glycine solution was added, and quenched for 5 min by putting on the

688 shaker with the same setting. Then organoids were pelleted by 800 RCF centrifugation for 2 min at 4°C,

689 and solutions were removed. The organoids pellets were moved to a 1.5 ml tube, washed with 4 °C PBS,

690 and pelleted by 800 RCF centrifugation for 5 min at 4°C, and repeated wash once. Then PBS was

691 removed and the crosslinked cell pellets were snap frozen in liquid nitrogen, and stored in -80 °C freezer.

692 Primary hepatocytes were crosslink similarly.

693

694 Crosslinked material was resuspended in 0.1% SDS (50mM Tris-HCl (pH 8), 10mM EDTA) and sonicated

695 for 5min with a Covaris E220 instrument (5% duty cycle, 140 Peak Incident Power, 200 cycles per burst,

696 1ml AFA Fiber milliTUBEs). Soluble chromatin (5 µg) is immunoprecipitated with Protein A/G Dynabeads

697 (Thermo Fisher Scientific, 10002D, 10004D) and 10µg of H3K27ac (Diagenode, C15410196). ChIP-seq

698 libraries were constructed using Accel-NGS 2S DNA library kit from Swift Biosciences. Fragments of the  
699 desired size were enriched using AMPure XP beads (Beckman Coulter). Libraries were sequenced on an  
700 Illumina NovaSeq 6000 instrument with 50 bp paired-end sequencing.

701

702 ChIP-seq datasets were aligned using bowtie (Langmead et al., 2009) to the hg38 reference genome  
703 using only the standard chromosomes (i.e. chr1 through chr19, chrX, chrY and chrM) with parameter `-k 1`  
704 `-m1 -best` and `-l` set to read length.

705

706 Peaks were called using MACS (Zhang et al., 2008) with parameters `-p 1e-9 -keep-dup=auto` and input  
707 control. These files were subsequently normalized to the millions of mapped reads and displayed in the  
708 UCSC Genome Browser (Kent et al., 2002). Peaks from H3K27Ac ChIP-Seq were used for super-  
709 enhancer analyses were performed using ROSE (Whyte et al., 2013)

710 ([https://bitbucket.org/young\\_computation/rose](https://bitbucket.org/young_computation/rose)) with parameters `-s 12500 -t 2000`. Stitched enhancers

711 were assigned to the single expressed RefSeq gene whose transcription start site was nearest the center  
712 of the stitched enhancer.

713

#### 714 **Enrichment analysis of liver-disease associated SNPs**

715 Stratified LD score regression (Furuyama et al., 2019) was used to summary statistics from 10 GWAS  
716 studies – ALP, ALT, AST, and GGT (Chambers et al., 2011); HDL, LDL, TC and TG (Willer et al., 2013);  
717 T2D and T2D stratified by BMI (Mahajan et al., 2018) combined with chromatin data from the tissue  
718 samples of the Roadmap Epigenomics and ENCODE projects (Consortium, 2012; Roadmap  
719 Epigenomics et al., 2015). Analyses were performed as described (Furuyama et al., 2019), using LDSC  
720 v1.0.1 to compare cell types in a model also containing the full baseline model v1.2 annotations.

721

#### 722 **Quantification of intracellular urea**

723 Urea quantification was performed with a urea measurement kit (abcam-ab83362). CellTiter-Glo 3D Cell  
724 Viability Assay (Promega G9681) were used for normalization.

725

#### 726 **Mice and splenic injection of human PSC-differentiated hepatocyte-like cells**

727 Immunodeficient NOD.Cg-*Prkdc*<sup>scid</sup> *Il2rg*<sup>tm1Wjl</sup>/SzJ (NSG) mice were obtained from the Jackson Laboratory  
728 and housed in autoclaved cages with autoclaved food and water in environmentally controlled rooms at  
729 the Whitehead Institute animal facility. Human PSC differentiated hepatocytes spheroids were washed  
730 with PBS, then digested with Accutase in a 37 °C water bath for about 20 min with agitation every 3-5  
731 min. The samples were gently pipetted with a 1 mL pipettor for better dissociation and washed with RPMI-  
732 1640 medium with 1% BSA-fragment V. The dissociated cells were counted with Countess, resuspended  
733 in RPMI-1640 medium and kept on ice until transplantation. NSG recipient mice (2-3 months) were  
734 anesthetized with avertin before lateral incisions were made to expose the spleens. About 0.5-1 million  
735 cells in about 100 µL RPMI-1640 medium were injected to a spleen of with a 1 ml syringe and a 23-gauge  
736 needle. Then the peritoneum and skin were closed with suture and wound clips respectively. The  
737 transplanted mice were examined 3 days after transplantation. At 1 month or 6 months post  
738 transplantation, transplanted mice were sacrificed and liver tissues were fixed in 10% buffer neutralized  
739 formalin solution overnight at 4 °C before tissue processing and paraffin embedding. All mice experiments  
740 were in accordance with the protocols approved by the Animal Research Regulation Committee at the  
741 Whitehead Institute and guidelines from the Department of Comparative Medicine at Massachusetts  
742 Institute of Technology.

743

#### 744 **Immunofluorescence staining**

745 Five-micron paraffin slices from FFPE mouse tissue samples were generated with a microtome (Leica)  
746 and attached to glass slides. The antigen retrieval and immunofluorescence staining procedures were  
747 performed similarly as described above.

748

749 Human PSC differentiated hepatocytes spheroids were washed with PBS, and fixed in freshly prepared  
750 4% PFA for 2 hours at room temperature on a rocking platform, followed by wash with PBS twice.  
751 Samples were embedded in paraffin followed by tissue processing describe above. The thin sections  
752 were deparaffinized followed by antigen retrieval, and blocked with PBS with 0.1% Tween, and 5%  
753 donkey serum for 1 hour at room temperature, and incubated with primary antibodies overnight at 4 °C  
754 (1:100 mouse anti CYP3A4 antibody, Life Technologies MA5-17064, 1:100 goat anti Albumin antibody,  
755 Bethyl A80-229A).

756

757 For wholemount staining, the spheroids were fixed as above, followed by incubation in PBS for 20 min,  
758 then PBS with 0.5% Tx100 for 20 min. Afterwards, the samples were blocked in PBS with 0.1% Tween  
759 and 5% donkey serum for 1 hour, followed by overnight incubation with primary antibody overnight at 4 °C  
760 (1:100 rabbit-anti-HNF4A Cell signaling 3113S; 1:250 mouse anti-AFP antibody, Sigma A8452; 1:100  
761 mouse anti CYP3A4 antibody, Life Technologies MA5-17064, 1:100 goat anti Albumin antibody, Bethyl  
762 A80-229A). The washing, secondary antibody incubation, DAPI staining, mounting and imaging steps  
763 were similar as described above.

764

### 765 **Plasmids**

766 The *CYP3A4* proximal enhancer was predicted based on ATAC-seq datasets. E-crispr ([http://www.e-](http://www.e-crisp.org/E-CRISP/)  
767 [crisp.org/E-CRISP/](http://www.e-crisp.org/E-CRISP/)) was used to design sgRNAs targeting the boundaries of *CYP3A4* enhancer. To  
768 generate sgRNA constructs targeting *CYP3A4* proximal enhancer, the annealed products of  
769 CACCGGCACATGGTAAACACTAAGA and AAACCTCTTAGTGTTTACCATGTGCC were ligated to BbsI  
770 linearized Cas9-cherry plasmid to generate 330-cherry-*CYP3A4*-enhancer-L-sgRNA. Similarly, the  
771 annealed products of CACCGGAAACTCATGTCCCAATTAA and AAACCTTAATTGGGACATGAGTTTCC  
772 were ligated to BbsI linearized Cas9-BFP to generate 330-BFP-*CYP3A4*-enhancer-R-sgRNA.

773

774 The larger fragment from restriction digestion of pAAVS1-PDi-CRISPRn (Addgene 73500) using AgeI and  
775 PacI was ligated to annealed DNA from two oligoes:

776 TAACTTAGGTACCATCCTGCAGGATGGCCGGCCATA and

777 CCGGTATGGCCGGCCATCCTGCAGGATGGTACCTAAGTTAAT. Then the ligated plasmid was

778 digested with KpnI and ClaI, and the dCas9-VP64 (from Addgene 61422) and MS2-p65-HSF1 (from

779 Addgene 61423) fragments were inserted to generate a doxycycline (DOX) inducible CRISPR activation

780 *AAVS1* targeting construct.

781

782 To generate sgRNA construct targeting *PDX1* promoter for gene activation, the annealed products of

783 CACCGGCAGGTGCTCGCGGGTACCT and AAACAGGTACCCGCGAGCACCTGCC were ligated to

784 BsmBI linearized lenti sgRNA(MS2)\_zeo backbone (Addgene 61427). Similarly, the annealed products

785 from CACCGGATTCACCTGGGGTCAACAC and AAAGTGTGACCCCAGGTGAATCC were ligated to  
786 BsmBI linearized and purified lenti sgRNA\_zeo backbone (Addgene 61427) to target proximal enhancer  
787 of *CYP3A4*.

788

### 789 **Statistics**

790 Data are expressed as the mean  $\pm$  s.e.m. or mean  $\pm$  standard errors, as indicated in the figure legends  
791 with  $n$  and statistical tests. All data are representative of at least two independent experiments (except for  
792 ATAC-sequencing). Statistical analyses were performed using Prism 8 software (GraphPad), and  
793 statistical significance was reached when  $P \leq 0.05$ .

794

### 795 **Data availability**

796 DNA constructs reported in this study are available from Addgene (plasmid ID: 176836-176841).  
797 Genetically modified cells used in this study will be available from the corresponding author with an MTA.  
798 Next generation sequencing (NGS) data of this study were submitted to the Gene Expression Omnibus  
799 (GSE185360).

800

### 801 **Acknowledgments**

802 We thank Drs. S Henikoff and F. Zhang for sharing research reagents; Dr. S. Markoulaki, and R. Flannery  
803 for assistance; Drs. P. Sharp, U. Stiliz, K. Little, B. Finan, C. Ivashchenko, R. Jing, members of the R.J.  
804 laboratory, R.A.Y laboratory, and L.G.G laboratory for discussions; Dr. B. Yuan (Bioinformatics and  
805 Research Computing Group of the Whitehead Institute) for assisting with the bioinformatics analysis; W.  
806 Salmon (W.M. Keck Biological Imaging Facility of the Whitehead Institute) for assistance with  
807 fluorescence imaging; P. Wisniewski and P. Autissier (Whitehead Institute) for assisting with cell sorting;  
808 members of the Genome Technology Core at the Whitehead Institute for assisting with sequencing  
809 experiments; E Spooner and E. Dudek (Whitehead Institute Proteomics Facility) for helping with mass-  
810 spectrometry experiments. This study was supported by a collaborative research agreement from Novo  
811 Nordisk, and NIH grant 1R01-NS088538 (to R.J.).

812

### 813 **Author contributions**

814 R.J., R.A.Y., L.G.G., and H.W.L. supervised the research. R.J. and H.M. wrote the manuscript. H.M., E.Z.,  
815 Y.G., P.C., S.S., and D.F. performed experiments. H.M., P.T., Y.G., M.B., A.D., and B.A. analyzed results.  
816 J.F.J. provided advice and edited the manuscript. C.G.E edited the manuscript. T.L. provided advice. L.G.  
817 provided primary hepatocytes.

818

819 **Declaration of interests**

820 R.J. is a cofounder of Fate, Fulcrum, and Omega Therapeutics and an advisor to Dewpoint and Camp4  
821 Therapeutics. R.A.Y. is a founder and shareholder of Syros Pharmaceuticals, Camp4 Therapeutics,  
822 Omega Therapeutics, and Dewpoint Therapeutics. J.F.J. and M.B. are employees of Novo Nordisk A/S.  
823 T.L. is a shareholder of Syros Pharmaceuticals and a consultant to Camp4 Therapeutics. The remaining  
824 authors have no competing interests.

825

826 **References**

- 827 Aizarani, N., Saviano, A., Sagar, M., Maily, L., Durand, S., Herman, J.S., Pessaux, P., Baumert, T.F., and  
828 Grun, D. (2019). A human liver cell atlas reveals heterogeneity and epithelial progenitors. *Nature* 572,  
829 199-204.
- 830 Ang, L.T., Tan, A.K.Y., Autio, M.I., Goh, S.H., Choo, S.H., Lee, K.L., Tan, J., Pan, B., Lee, J.J.H., Lum,  
831 J.J., *et al.* (2018). A Roadmap for Human Liver Differentiation from Pluripotent Stem Cells. *Cell Rep* 22,  
832 2190-2205.
- 833 Azuma, H., Paulk, N., Ranade, A., Dorrell, C., Al-Dhalimy, M., Ellis, E., Strom, S., Kay, M.A., Finegold, M.,  
834 and Grompe, M. (2007). Robust expansion of human hepatocytes in *Fah<sup>-/-</sup>/Rag2<sup>-/-</sup>/Il2rg<sup>-/-</sup>* mice. *Nature*  
835 *biotechnology* 25, 903-910.
- 836 Bhatia, S.N., Underhill, G.H., Zaret, K.S., and Fox, I.J. (2014). Cell and tissue engineering for liver  
837 disease. *Sci Transl Med* 6, 245sr242.
- 838 Bogacheva, M.S., Bystriakova, M.A., and Lou, Y.R. (2021). Thyroid Hormone Effect on the Differentiation  
839 of Human Induced Pluripotent Stem Cells into Hepatocyte-Like Cells. *Pharmaceuticals (Basel)* 14.
- 840 Brent, G.A. (2012). Mechanisms of thyroid hormone action. *J Clin Invest* 122, 3035-3043.
- 841 Buenrostro, J.D., Giresi, P.G., Zaba, L.C., Chang, H.Y., and Greenleaf, W.J. (2013). Transposition of  
842 native chromatin for fast and sensitive epigenomic profiling of open chromatin, DNA-binding proteins and  
843 nucleosome position. *Nat Methods* 10, 1213-1218.
- 844 Camp, J.G., Sekine, K., Gerber, T., Loeffler-Wirth, H., Binder, H., Gac, M., Kanton, S., Kageyama, J.,  
845 Damm, G., Seehofer, D., *et al.* (2017). Multilineage communication regulates human liver bud  
846 development from pluripotency. *Nature* 546, 533-538.
- 847 Carpentier, A., Tesfaye, A., Chu, V., Nimgaonkar, I., Zhang, F., Lee, S.B., Thorgeirsson, S.S., Feinstone,  
848 S.M., and Liang, T.J. (2014). Engrafted human stem cell-derived hepatocytes establish an infectious HCV  
849 murine model. *J Clin Invest* 124, 4953-4964.
- 850 Chambers, J.C., Zhang, W., Sehmi, J., Li, X., Wass, M.N., Van der Harst, P., Holm, H., Sanna, S.,  
851 Kavousi, M., Baumeister, S.E., *et al.* (2011). Genome-wide association study identifies loci influencing  
852 concentrations of liver enzymes in plasma. *Nat Genet* 43, 1131-1138.
- 853 Chen, C., Soto-Gutierrez, A., Baptista, P.M., and Spee, B. (2018). Biotechnology Challenges to In Vitro  
854 Maturation of Hepatic Stem Cells. *Gastroenterology* 154, 1258-1272.

855 Chen, S., Wang, J., Ren, H., Liu, Y., Xiang, C., Li, C., Lu, S., Shi, Y., Deng, H., and Shi, X. (2020).  
856 Hepatic spheroids derived from human induced pluripotent stem cells in bio-artificial liver rescue porcine  
857 acute liver failure. *Cell research* 30, 95-97.

858 Clapier, C.R., Iwasa, J., Cairns, B.R., and Peterson, C.L. (2017). Mechanisms of action and regulation of  
859 ATP-dependent chromatin-remodelling complexes. *Nat Rev Mol Cell Biol* 18, 407-422.

860 Consortium, E.P. (2012). An integrated encyclopedia of DNA elements in the human genome. *Nature*  
861 489, 57-74.

862 Creighton, M.P., Cheng, A.W., Welstead, G.G., Kooistra, T., Carey, B.W., Steine, E.J., Hanna, J.,  
863 Lodato, M.A., Frampton, G.M., Sharp, P.A., *et al.* (2010). Histone H3K27ac separates active from poised  
864 enhancers and predicts developmental state. *Proceedings of the National Academy of Sciences of the*  
865 *United States of America* 107, 21931-21936.

866 Dobin, A., Davis, C.A., Schlesinger, F., Drenkow, J., Zaleski, C., Jha, S., Batut, P., Chaisson, M., and  
867 Gingeras, T.R. (2013). STAR: ultrafast universal RNA-seq aligner. *Bioinformatics* 29, 15-21.

868 Evans, R.M., and Mangelsdorf, D.J. (2014). Nuclear Receptors, RXR, and the Big Bang. *Cell* 157, 255-  
869 266.

870 Fahrmayr, C., Fromm, M.F., and König, J. (2010). Hepatic OATP and OCT uptake transporters: their role  
871 for drug-drug interactions and pharmacogenetic aspects. *Drug Metab Rev* 42, 380-401.

872 Finucane, H.K., Reshef, Y.A., Anttila, V., Slowikowski, K., Gusev, A., Byrnes, A., Gazal, S., Loh, P.R.,  
873 Lareau, C., Shores, N., *et al.* (2018). Heritability enrichment of specifically expressed genes identifies  
874 disease-relevant tissues and cell types. *Nat Genet* 50, 621-629.

875 Furuyama, K., Chera, S., van Gurp, L., Oropeza, D., Ghila, L., Damond, N., Vethe, H., Paulo, J.A.,  
876 Joosten, A.M., Berney, T., *et al.* (2019). Diabetes relief in mice by glucose-sensing insulin-secreting  
877 human alpha-cells. *Nature* 567, 43-48.

878 Godoy, P., Hewitt, N.J., Albrecht, U., Andersen, M.E., Ansari, N., Bhattacharya, S., Bode, J.G., Bolleyn,  
879 J., Borner, C., Bottger, J., *et al.* (2013). Recent advances in 2D and 3D in vitro systems using primary  
880 hepatocytes, alternative hepatocyte sources and non-parenchymal liver cells and their use in  
881 investigating mechanisms of hepatotoxicity, cell signaling and ADME. *Arch Toxicol* 87, 1315-1530.



882 Heinz, S., Benner, C., Spann, N., Bertolino, E., Lin, Y.C., Laslo, P., Cheng, J.X., Murre, C., Singh, H., and  
883 Glass, C.K. (2010). Simple combinations of lineage-determining transcription factors prime cis-regulatory  
884 elements required for macrophage and B cell identities. *Molecular cell* 38, 576-589.

885 Hu, H., Gehart, H., Artegiani, B., C, L.O.-I., Dekkers, F., Basak, O., van Es, J., Chuva de Sousa Lopes,  
886 S.M., Begthel, H., Korving, J., *et al.* (2018). Long-Term Expansion of Functional Mouse and Human  
887 Hepatocytes as 3D Organoids. *Cell* 175, 1591-1606 e1519.

888 Huch, M., Gehart, H., van Boxtel, R., Hamer, K., Blokzijl, F., Verstegen, M.M., Ellis, E., van Wenum, M.,  
889 Fuchs, S.A., de Ligt, J., *et al.* (2015). Long-term culture of genome-stable bipotent stem cells from adult  
890 human liver. *Cell* 160, 299-312.

891 Kadoch, C., and Crabtree, G.R. (2015). Mammalian SWI/SNF chromatin remodeling complexes and  
892 cancer: Mechanistic insights gained from human genomics. *Sci Adv* 1, e1500447.

893 Kamiya, A., Kinoshita, T., and Miyajima, A. (2001). Oncostatin M and hepatocyte growth factor induce  
894 hepatic maturation via distinct signaling pathways. *FEBS Lett* 492, 90-94.

895 Kent, W.J., Sugnet, C.W., Furey, T.S., Roskin, K.M., Pringle, T.H., Zahler, A.M., and Haussler, D. (2002).  
896 The human genome browser at UCSC. *Genome Res* 12, 996-1006.

897 Kyrmizi, I., Hatzis, P., Katrakili, N., Tronche, F., Gonzalez, F.J., and Talianidis, I. (2006). Plasticity and  
898 expanding complexity of the hepatic transcription factor network during liver development. *Genes Dev* 20,  
899 2293-2305.

900 Langmead, B., Trapnell, C., Pop, M., and Salzberg, S.L. (2009). Ultrafast and memory-efficient alignment  
901 of short DNA sequences to the human genome. *Genome Biol* 10, R25.

902 Lee, T.I., Johnstone, S.E., and Young, R.A. (2006). Chromatin immunoprecipitation and microarray-based  
903 analysis of protein location. *Nat Protoc* 1, 729-748.

904 Lengner, C.J., Gimelbrant, A.A., Erwin, J.A., Cheng, A.W., Guenther, M.G., Welstead, G.G., Alagappan,  
905 R., Frampton, G.M., Xu, P., Muffat, J., *et al.* (2010). Derivation of pre-X inactivation human embryonic  
906 stem cells under physiological oxygen concentrations. *Cell* 141, 872-883.

907 Li, H., Handsaker, B., Wysoker, A., Fennell, T., Ruan, J., Homer, N., Marth, G., Abecasis, G., Durbin, R.,  
908 and Genome Project Data Processing, S. (2009). The Sequence Alignment/Map format and SAMtools.  
909 *Bioinformatics* 25, 2078-2079.

910 Li, M., Zhao, H., Zhang, X., Wood, L.D., Anders, R.A., Choti, M.A., Pawlik, T.M., Daniel, H.D., Kannangai,  
911 R., Offerhaus, G.J., *et al.* (2011). Inactivating mutations of the chromatin remodeling gene ARID2 in  
912 hepatocellular carcinoma. *Nat Genet* 43, 828-829.

913 Liao, Y., Smyth, G.K., and Shi, W. (2014). featureCounts: an efficient general purpose program for  
914 assigning sequence reads to genomic features. *Bioinformatics* 30, 923-930.

915 Love, M.I., Huber, W., and Anders, S. (2014). Moderated estimation of fold change and dispersion for  
916 RNA-seq data with DESeq2. *Genome Biol* 15, 550.

917 Ma, H., Jeppesen, J.F., and Jaenisch, R. (2020). Human T Cells Expressing a CD19 CAR-T Receptor  
918 Provide Insights into Mechanisms of Human CD19-Positive beta Cell Destruction. *Cell Rep Med* 1,  
919 100097.

920 Ma, H., Wert, K.J., Shvartsman, D., Melton, D.A., and Jaenisch, R. (2018). Establishment of human  
921 pluripotent stem cell-derived pancreatic beta-like cells in the mouse pancreas. *Proceedings of the*  
922 *National Academy of Sciences of the United States of America* 115, 3924-3929.

923 MacParland, S.A., Liu, J.C., Ma, X.Z., Innes, B.T., Bartczak, A.M., Gage, B.K., Manuel, J., Khuu, N.,  
924 Echeverri, J., Linares, I., *et al.* (2018). Single cell RNA sequencing of human liver reveals distinct  
925 intrahepatic macrophage populations. *Nature communications* 9, 4383.

926 Maetzel, D., Sarkar, S., Wang, H., Abi-Mosleh, L., Xu, P., Cheng, A.W., Gao, Q., Mitalipova, M., and  
927 Jaenisch, R. (2014). Genetic and chemical correction of cholesterol accumulation and impaired  
928 autophagy in hepatic and neural cells derived from Niemann-Pick Type C patient-specific iPSCs. *Stem*  
929 *Cell Reports* 2, 866-880.

930 Mahajan, A., Wessel, J., Willems, S.M., Zhao, W., Robertson, N.R., Chu, A.Y., Gan, W., Kitajima, H.,  
931 Taliun, D., Rayner, N.W., *et al.* (2018). Refining the accuracy of validated target identification through  
932 coding variant fine-mapping in type 2 diabetes. *Nat Genet* 50, 559-571.

933 Mantri, R., Bavdekar, S.B., and Save, S.U. (2016). Congenital Hypothyroidism: An Unusual Combination  
934 of Biochemical Abnormalities. *Case Rep Pediatr* 2016, 2678578.

935 Michailidis, E., Vercauteren, K., Mancio-Silva, L., Andrus, L., Jahan, C., Ricardo-Lax, I., Zou, C., Kabbani,  
936 M., Park, P., Quirk, C., *et al.* (2020). Expansion, in vivo-ex vivo cycling, and genetic manipulation of  
937 primary human hepatocytes. *Proceedings of the National Academy of Sciences of the United States of*  
938 *America* 117, 1678-1688.

939 Musunuru, K., Strong, A., Frank-Kamenetsky, M., Lee, N.E., Ahfeldt, T., Sachs, K.V., Li, X., Li, H.,  
940 Kuperwasser, N., Ruda, V.M., *et al.* (2010). From noncoding variant to phenotype via SORT1 at the 1p13  
941 cholesterol locus. *Nature* 466, 714-719.

942 Ogawa, S., Surapisitchat, J., Virtanen, C., Ogawa, M., Niapour, M., Sugamori, K.S., Wang, S., Tamblyn,  
943 L., Guillemette, C., Hoffmann, E., *et al.* (2013). Three-dimensional culture and cAMP signaling promote  
944 the maturation of human pluripotent stem cell-derived hepatocytes. *Development* 140, 3285-3296.

945 Ogryzko, V.V., Schiltz, R.L., Russanova, V., Howard, B.H., and Nakatani, Y. (1996). The transcriptional  
946 coactivators p300 and CBP are histone acetyltransferases. *Cell* 87, 953-959.

947 Partridge, E.C., Chhetri, S.B., Prokop, J.W., Ramaker, R.C., Jansen, C.S., Goh, S.T., Mackiewicz, M.,  
948 Newberry, K.M., Brandsmeier, L.A., Meadows, S.K., *et al.* (2020). Occupancy maps of 208 chromatin-  
949 associated proteins in one human cell type. *Nature* 583, 720-728.

950 Peng, W.C., Logan, C.Y., Fish, M., Anbarchian, T., Aguisanda, F., Alvarez-Varela, A., Wu, P., Jin, Y.,  
951 Zhu, J., Li, B., *et al.* (2018). Inflammatory Cytokine TNFalpha Promotes the Long-Term Expansion of  
952 Primary Hepatocytes in 3D Culture. *Cell* 175, 1607-1619 e1615.

953 Prior, N., Inacio, P., and Huch, M. (2019). Liver organoids: from basic research to therapeutic  
954 applications. *Gut* 68, 2228-2237.

955 Quinlan, A.R., and Hall, I.M. (2010). BEDTools: a flexible suite of utilities for comparing genomic features.  
956 *Bioinformatics* 26, 841-842.

957 Ramirez, F., Dundar, F., Diehl, S., Gruning, B.A., and Manke, T. (2014). deepTools: a flexible platform for  
958 exploring deep-sequencing data. *Nucleic Acids Res* 42, W187-191.

959 Roadmap Epigenomics, C., Kundaje, A., Meuleman, W., Ernst, J., Bilenky, M., Yen, A., Heravi-Moussavi,  
960 A., Kheradpour, P., Zhang, Z., Wang, J., *et al.* (2015). Integrative analysis of 111 reference human  
961 epigenomes. *Nature* 518, 317-330.

962 Roost, M.S., van Iperen, L., Ariyurek, Y., Buermans, H.P., Arindrarto, W., Devalla, H.D., Passier, R.,  
963 Mummery, C.L., Carlotti, F., de Koning, E.J., *et al.* (2015). KeyGenes, a Tool to Probe Tissue  
964 Differentiation Using a Human Fetal Transcriptional Atlas. *Stem Cell Reports* 4, 1112-1124.

965 Si-Tayeb, K., Lemaigre, F.P., and Duncan, S.A. (2010a). Organogenesis and development of the liver.  
966 *Dev Cell* 18, 175-189.

967 Si-Tayeb, K., Noto, F.K., Nagaoka, M., Li, J., Battle, M.A., Duris, C., North, P.E., Dalton, S., and Duncan,  
968 S.A. (2010b). Highly efficient generation of human hepatocyte-like cells from induced pluripotent stem  
969 cells. *Hepatology* 51, 297-305.

970 Skene, P.J., Henikoff, J.G., and Henikoff, S. (2018). Targeted in situ genome-wide profiling with high  
971 efficiency for low cell numbers. *Nat Protoc* 13, 1006-1019.

972 Subramanian, A., Tamayo, P., Mootha, V.K., Mukherjee, S., Ebert, B.L., Gillette, M.A., Paulovich, A.,  
973 Pomeroy, S.L., Golub, T.R., Lander, E.S., *et al.* (2005). Gene set enrichment analysis: a knowledge-  
974 based approach for interpreting genome-wide expression profiles. *Proceedings of the National Academy*  
975 *of Sciences of the United States of America* 102, 15545-15550.

976 Takebe, T., Sekine, K., Enomura, M., Koike, H., Kimura, M., Ogaeri, T., Zhang, R.R., Ueno, Y., Zheng,  
977 Y.W., Koike, N., *et al.* (2013). Vascularized and functional human liver from an iPSC-derived organ bud  
978 transplant. *Nature* 499, 481-484.

979 Uren, P.J., Bahrami-Samani, E., de Araujo, P.R., Vogel, C., Qiao, M., Burns, S.C., Smith, A.D., and  
980 Penalva, L.O. (2016). High-throughput analyses of hnRNP H1 dissects its multi-functional aspect. *RNA*  
981 *Biol* 13, 400-411.

982 Wei, Z., Yoshihara, E., He, N., Hah, N., Fan, W., Pinto, A.F.M., Huddy, T., Wang, Y., Ross, B., Estepa,  
983 G., *et al.* (2018). Vitamin D Switches BAF Complexes to Protect beta Cells. *Cell* 173, 1135-1149 e1115.

984 Whyte, W.A., Orlando, D.A., Hnisz, D., Abraham, B.J., Lin, C.Y., Kagey, M.H., Rahl, P.B., Lee, T.I., and  
985 Young, R.A. (2013). Master transcription factors and mediator establish super-enhancers at key cell  
986 identity genes. *Cell* 153, 307-319.

987 Willard, D.L., Leung, A.M., and Pearce, E.N. (2014). Thyroid function testing in patients with newly  
988 diagnosed hyperlipidemia. *JAMA Intern Med* 174, 287-289.

989 Willer, C.J., Schmidt, E.M., Sengupta, S., Peloso, G.M., Gustafsson, S., Kanoni, S., Ganna, A., Chen, J.,  
990 Buchkovich, M.L., Mora, S., *et al.* (2013). Discovery and refinement of loci associated with lipid levels. *Nat*  
991 *Genet* 45, 1274-1283.

992 Wu, C., Ma, M.H., Brown, K.R., Geisler, M., Li, L., Tzeng, E., Jia, C.Y., Jurisica, I., and Li, S.S. (2007).  
993 Systematic identification of SH3 domain-mediated human protein-protein interactions by peptide array  
994 target screening. *Proteomics* 7, 1775-1785.

995 Xiang, C., Du, Y., Meng, G., Soon Yi, L., Sun, S., Song, N., Zhang, X., Xiao, Y., Wang, J., Yi, Z., *et al.*  
996 (2019). Long-term functional maintenance of primary human hepatocytes in vitro. *Science* 364, 399-402.  
997 Xie, B., Sun, D., Du, Y., Jia, J., Sun, S., Xu, J., Liu, Y., Xiang, C., Chen, S., Xie, H., *et al.* (2019). A two-  
998 step lineage reprogramming strategy to generate functionally competent human hepatocytes from  
999 fibroblasts. *Cell research* 29, 696-710.  
1000 Zanger, U.M., and Schwab, M. (2013). Cytochrome P450 enzymes in drug metabolism: regulation of  
1001 gene expression, enzyme activities, and impact of genetic variation. *Pharmacol Ther* 138, 103-141.  
1002 Zaret, K.S., and Grompe, M. (2008). Generation and regeneration of cells of the liver and pancreas.  
1003 *Science* 322, 1490-1494.  
1004 Zhang, Y., Liu, T., Meyer, C.A., Eeckhoute, J., Johnson, D.S., Bernstein, B.E., Nusbaum, C., Myers, R.M.,  
1005 Brown, M., Li, W., *et al.* (2008). Model-based analysis of ChIP-Seq (MACS). *Genome Biol* 9, R137.  
1006 Zwaka, T.P., and Thomson, J.A. (2003). Homologous recombination in human embryonic stem cells.  
1007 *Nature biotechnology* 21, 319-321.  
1008  
1009

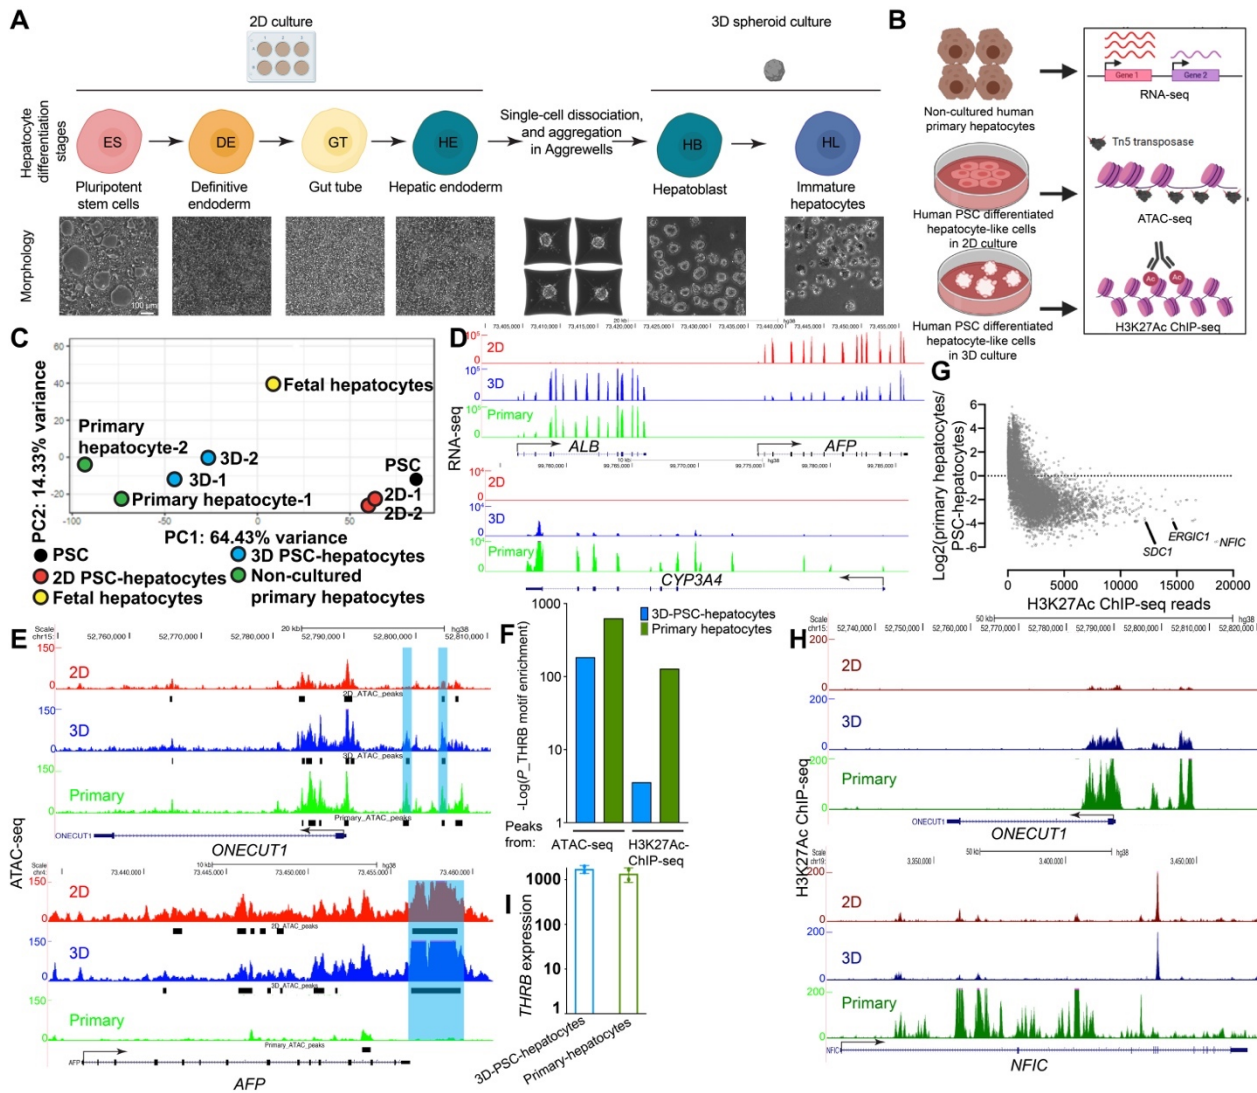

1010

1011 **Fig. 1. Regulome analysis identified differences in THR $\beta$  motif enrichment in accessible DNA and**  
 1012 **active enhancers between primary hepatocytes and PSC-differentiated hepatocytes.**

1013 (A) Development of a spheroid-based hepatocytes differentiation system from hPSC.

1014 (B) A cartoon diagram of experimental design. Uncultured primary hepatocytes, 2D PSC-hepatocytes, and  
 1015 3D PSC-hepatocytes were subjected to RNA-seq, ATAC-seq, and H3K27Ac ChIP-seq.

1016 (C) Principal component analysis (PCA) of 2D hPSC-hepatocytes, 3D hPSC-hepatocytes, uncultured  
 1017 primary hepatocytes, and fetal hepatocytes.

1018 (D) Genome browser gene tracks representing RNA-seq results of the *ALB*/*AFP* and *CYP34* loci from 2D  
 1019 PSC-hepatocytes (2D), 3D PSC-hepatocytes (3D), and primary hepatocytes (Primary).

1020 (E) ATAC-seq tracks of *ONECUT1* and *AFP* loci from 2D PSC-hepatocytes (2D), 3D PSC-hepatocytes  
 1021 (3D), and primary hepatocytes (3D).

1022 (F) Enrichment of *THRB* motifs ( $-\log P$ ) in the ATAC-seq peaks and H3K27Ac ChIP-seq peaks in 3D-PSC-  
1023 hepatocytes (blue) and primary hepatocytes (green).  
1024 (G) Differential analysis of H3K27Ac ChIP-seq between primary hepatocytes and PSC-hepatocytes.  
1025 (H) H3K27Ac ChIP-seq tracks of *ONECUT1* and *NFIC* loci from 2D PSC-hepatocytes (2D), 3D PSC-  
1026 hepatocytes (3D), and primary hepatocytes (3D).  
1027 (I) Expression of *THRB* in 3D PSC-hepatocytes and primary hepatocytes. Data showing mean  $\pm$  standard  
1028 error,  $n=2$ .  
1029 The scale bar in (A): 100  $\mu\text{m}$ .  
1030

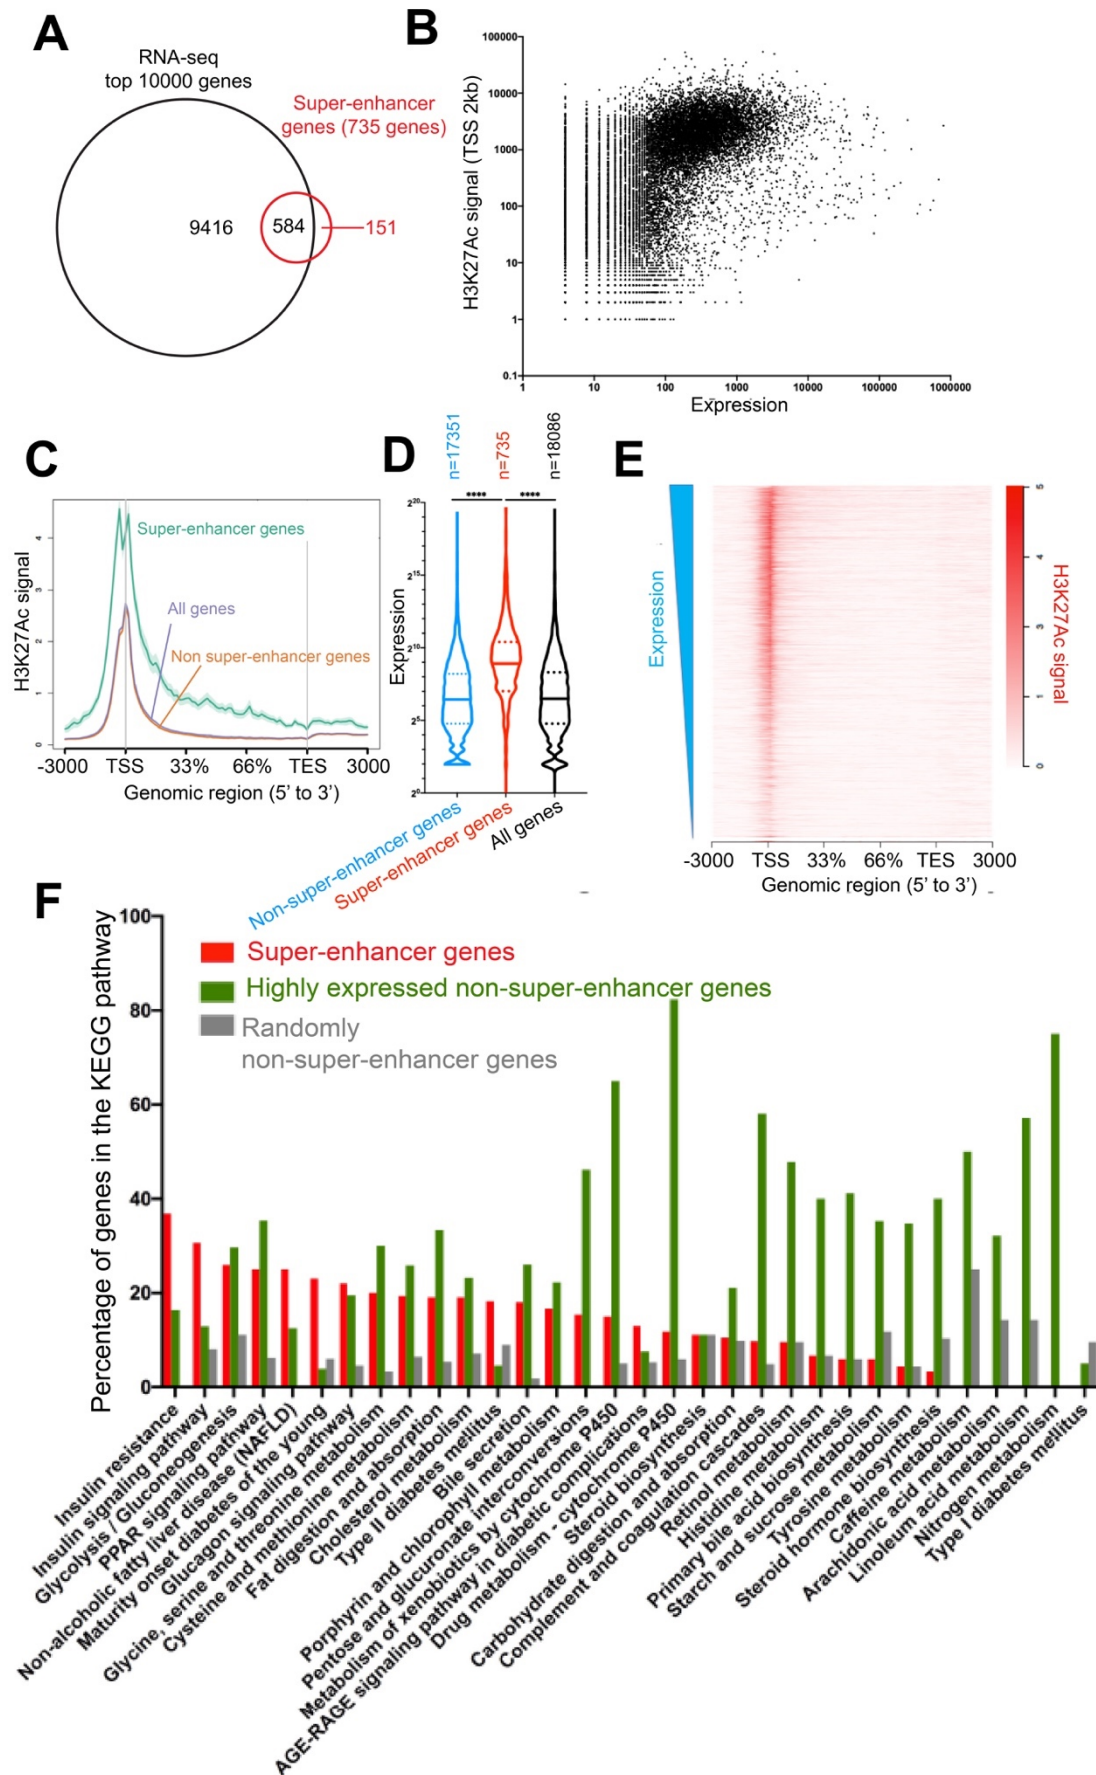



1032 **Figure. 2. Correlation between gene expression and H3K27Ac ChIP-seq signals.**

1033 (A) Overlapping between super-enhancer genes and top 10000 expressed genes from RNA-seq from  
1034 primary hepatocytes.

1035 (B-E) Correlation between gene expression and H3K27Ac ChIP-seq signals.

1036 (F) Super-enhancer genes list was used to query KEGG database, and proportion of super-enhancer  
1037 genes in the pathways were plotted (red bars). A list of highly expressed genes that are not super-  
1038 enhancer genes were subjected to the same analysis and proportion of highly expressed non-super-  
1039 enhancer genes in the pathways were plotted (green bars). Randomly selected genes were used as a  
1040 control (grey bars).

1041

1042

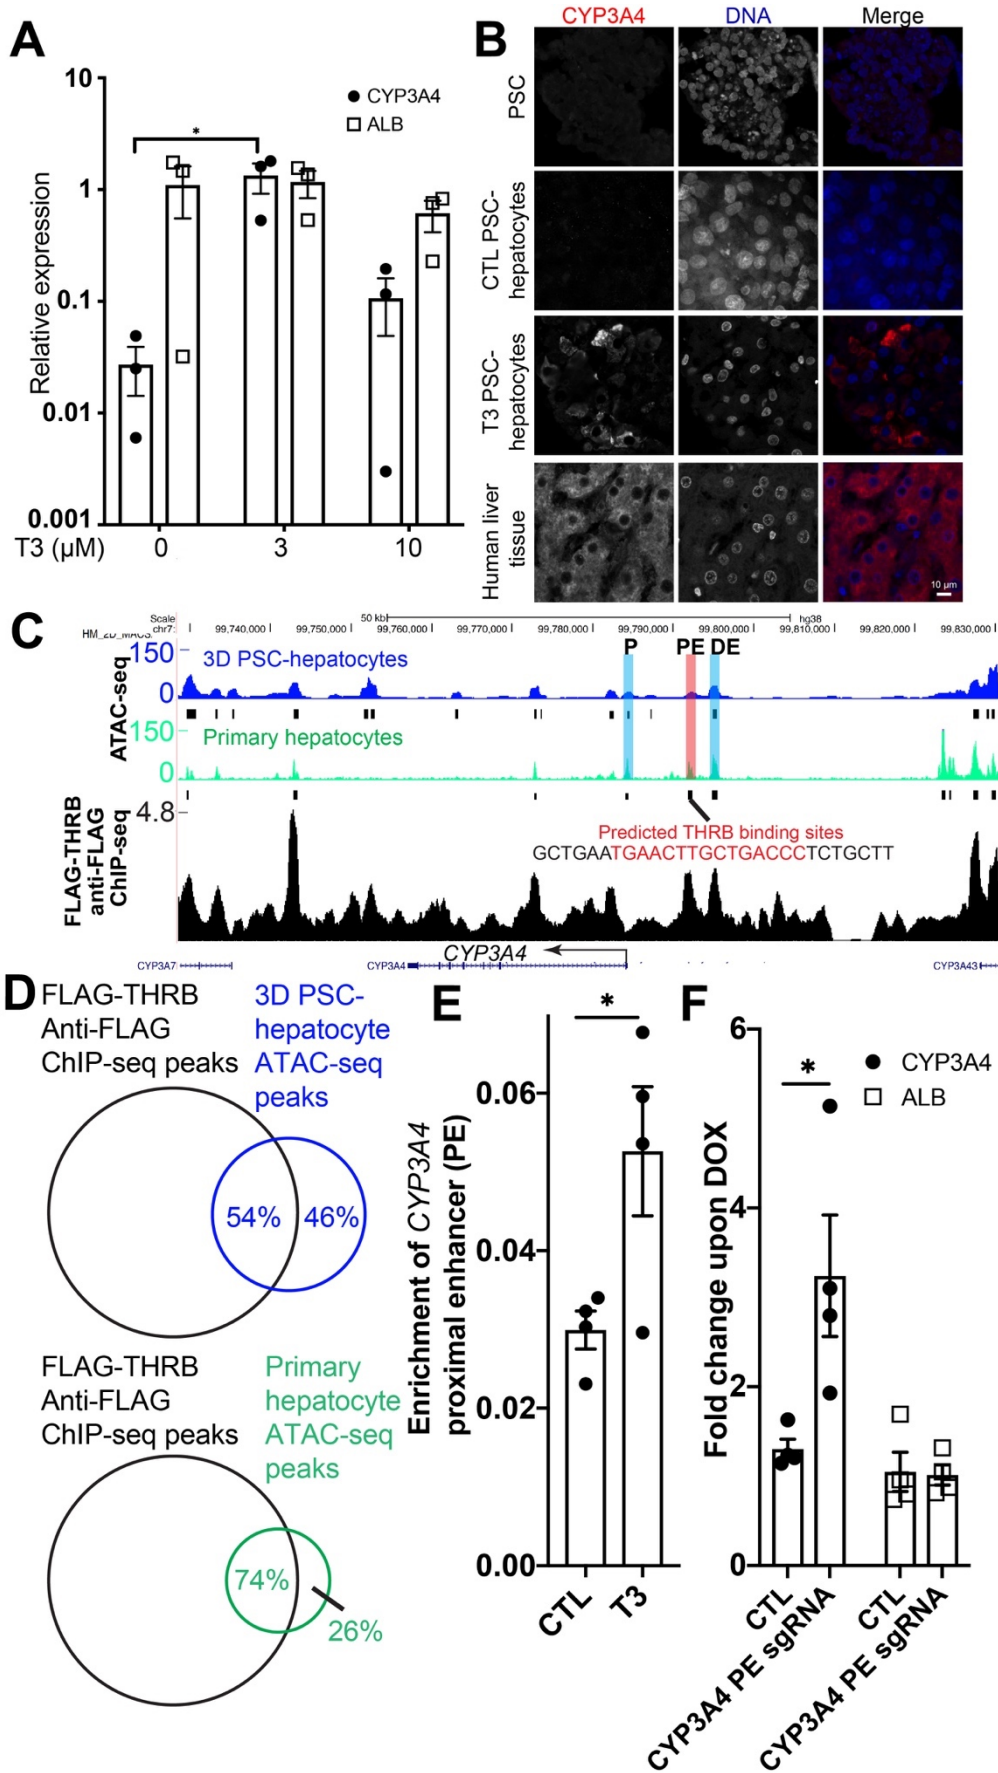

1044 **Figure 3. Thyroid hormone depended upregulation of *CYP3A4* transcription is mediated by binding of**  
1045 **THR $\beta$  to the proximal enhancer of *CYP3A4*.**

1046 (A) Effects of T3 on *CYP3A4* and *ALB* expression in PSC-hepatocytes differentiated in 3D spheroids  
1047 cultures. Plotted data are mean  $\pm$  s.e.m.,  $n=3$ . \* denotes  $P<0.05$ , two-sided Student's  $t$  test.

1048 (B) Immunofluorescence with an anti-*CYP3A4* antibody (red) on undifferentiated PSCs, control 3D PSC-  
1049 hepatocytes, T3 treated 3D PSC-hepatocytes, and human liver tissue.

1050 (C) ATAC-seq track of the *CYP3A4* locus was overlaid with anti-FLAG ChIP-seq data (GEO:  
1051 GSM2534017) from THR $\beta$ -FLAG HepG2 cells (HepG2 cells with FLAG tagging to the endogenous *THR $\beta$*   
1052 gene). The promoter and two 5' enhancer elements of *CYP3A4* were denoted as P, PE (proximal enhancer),  
1053 and DE (distal enhancer).

1054 (D) Overlapping of THR $\beta$  ChIP-seq and ATAC-seq peaks from 3D PSC-hepatocytes (top panel) and primary  
1055 hepatocytes (bottom panel). The percentage of ATAC-seq peaks that overlapped with THR $\beta$  ChIP-seq  
1056 peaks were labelled.

1057 (E) THR $\beta$ -FLAG HepG2 cells were cultured with T3 or not (CTL), followed by cut-and-run experiment with an  
1058 anti-FLAG antibody. The isolated DNA from MNase-proteinA treated cells were purified and subjected to q-  
1059 PCR analysis with primers spanning *CYP3A4* proximal enhancer (PE in c). Plotted data are mean  $\pm$  s.e.m.,  
1060  $n=4$ . \* denotes  $P<0.05$ , two-sided Student's  $t$  test.

1061 (F) DOX-inducible CRISPR activation H1 human PSCs were transduced with control sg lentivirus (CTL) or  
1062 lentivirus encoding sg RNA targeting *CYP3A4* proximal enhancer (PE). DOX was added to differentiated  
1063 hepatocyte-like cells for about 2 days, and RNA samples from cells were subjected to q-RT-PCR analysis  
1064 with *CYP3A4* primers (closed circles) and *ALB* primers (open squares). Plotted data are mean  $\pm$  s.e.m.,  $n=4$ .  
1065 \* denotes  $P<0.05$ , two-sided Student's  $t$  test.

1066 The scale bar in b: 10  $\mu$ m.

1067

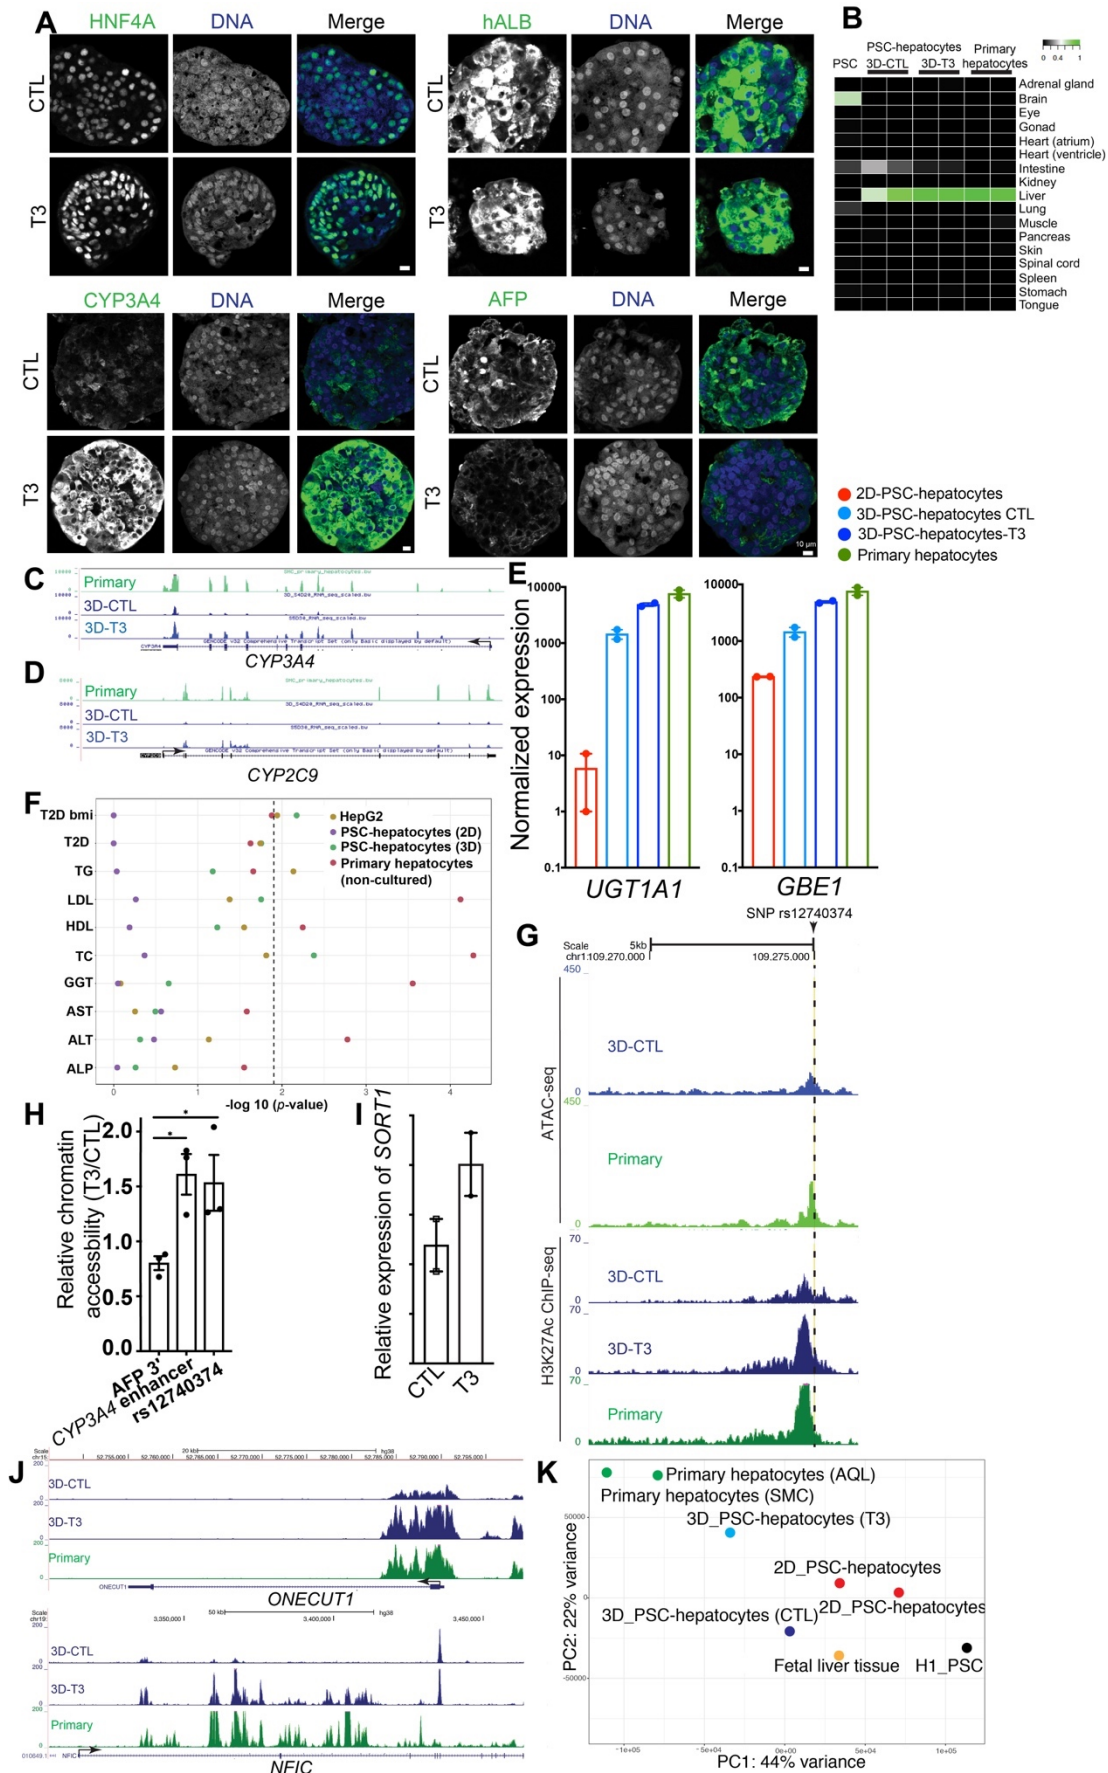

1069 **Figure 4. Generation of PSC-hepatocytes with advanced maturity by modulating thyroid hormone**  
1070 **signaling.**

1071 (A) Immunofluorescence staining of anti-HNF4A, human Albumin (ALB), CYP3A4, and AFP antibodies in  
1072 control PSC-hepatocytes (CTL) and PSC-hepatocytes treated with T3.

1073 (B) KeyGenes analysis of gene expression comparison of 3D control PSC-hepatocytes, 3D PSC-  
1074 hepatocytes treated with T3, and primary hepatocytes.

1075 (C-D) Genome browser gene tracks representing RNA-seq results of the *CYP3A4* (c) and *CYP2C9* (d) loci  
1076 from primary hepatocytes (Primary), control 3D PSC-hepatocytes (3D-CTL), and 3D PSC-hepatocytes  
1077 treated with T3 (3D-T3).

1078 (E) Expression of *UGT1A1* and *GBE1* in 2D-PSC-hepatocytes (red), control 3D-PSC-hepatocytes (light  
1079 blue), T3 treated 3D-PSC-hepatocytes (dark blue), and primary hepatocytes (green). Plotted data are mean  
1080  $\pm$  standard error,  $n=2$ .

1081 (F) Comparison of enrichment of GWAS signal in open chromatin in 2D- PSC-hepatocytes, 3D-PSC-  
1082 hepatocytes, and primary hepatocytes versus open chromatin across all ENCODE and Roadmap  
1083 Epigenomic tissues for a set of liver-relevant diseases and traits. Dotted line indicates  $P < 0.05$  and colors  
1084 denote the hepatocyte cell type tested.

1085 (G) ATAC-seq tracks (top panel) and H3K27Ac ChIP-seq tracks (bottom panel) of the region surrounding a  
1086 common non-encoding SNP rs12740374 that regulates *SORT1* expression in hepatocytes and plasma LDL-  
1087 C levels.

1088 (H) Relative chromatin accessibility of *AFP* 3' chromatin accessible peak, *CYP3A4* proximal enhancer peak,  
1089 rs12740374 peak from ATAC-seq libraries were measured by normalization to an *ACTB* chromatin  
1090 accessible peak with using quantitative-PCR. The ratio of PSC-hepatocytes treated with T3 compared to  
1091 control PSC-hepatocytes were plotted as mean  $\pm$  s.e.m. ( $n=3$ ).

1092 (I) Upregulation of *SORT1* expression by T3 treatment. Data shown are mean  $\pm$  standard error,  $n=2$ .

1093 (J) Gene tracks representing H3K27K27 ChIP-seq data of the *ONECUT1* and *NFIC* loci of control PSC-  
1094 hepatocytes (3D-CTL), T3 treated PSC-hepatocytes (3D-T3) and primary hepatocytes (Primary).

1095 (K) PCA analysis of super-enhancers from H1 PSC, fetal liver tissue, 2D PSC-hepatocytes, 3D PSC-  
1096 hepatocytes treated with T3 (T3), control 3D PSC-hepatocytes (CTL), and primary hepatocytes (AQL and  
1097 SMC). Scale bars in a: 10  $\mu$ m.

1098

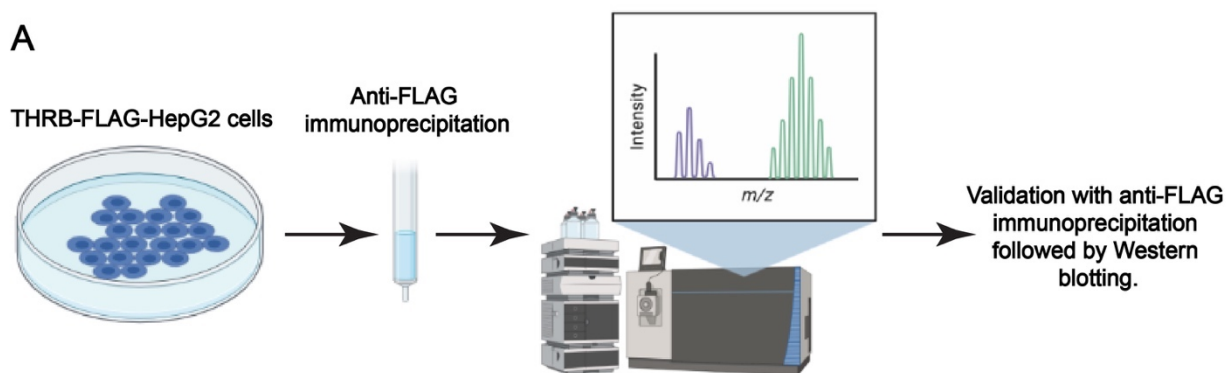

**B**

| Nuclear protein types                    | Number of identified proteins | Identified proteins                    |
|------------------------------------------|-------------------------------|----------------------------------------|
| pBAF components                          | 4                             | ARID2, PBRM1, SMARCC1, SMARCC2         |
| Heterogeneous nuclear ribonucleoproteins | 5                             | HNRNPB, HNRNPC, HNRNPH, HNRNPM, HNRNPU |
| Transcription initiation factors         | 6                             | TAF1, TAF4, TAF5, TAF7, TAF10, TAF13   |
| Others                                   | 4                             | TARDBP, CAND1, MCMBP, CBX1             |

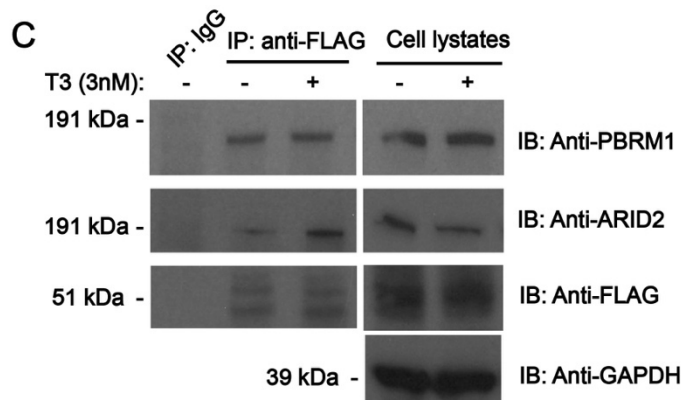

1099

1100 **Figure 5. Interactions between THRβ and pBAF components in THRβ-FLAG HepG2 cells.**

1101 (A) Experimental design to identify THRβ-binding proteins by immunoprecipitation with anti-FLAG

1102 antibody in THRβ-FLAG HepG2 cells followed by mass-spectrometry and IP-Western blotting analysis.

1103 (B) Identification of high confidence nuclear proteins co-immunoprecipitated with THRβ-FLAG ( $P < 0.01$ ).

1104 (C) Control THRβ-FLAG HepG2 cells or cells treated with 3 nM T3 for 1 day were lysed and subjected to

1105 anti-FLAG immunoprecipitation and Western blotting with pBAF components PBRM1 and ARID2.

1106

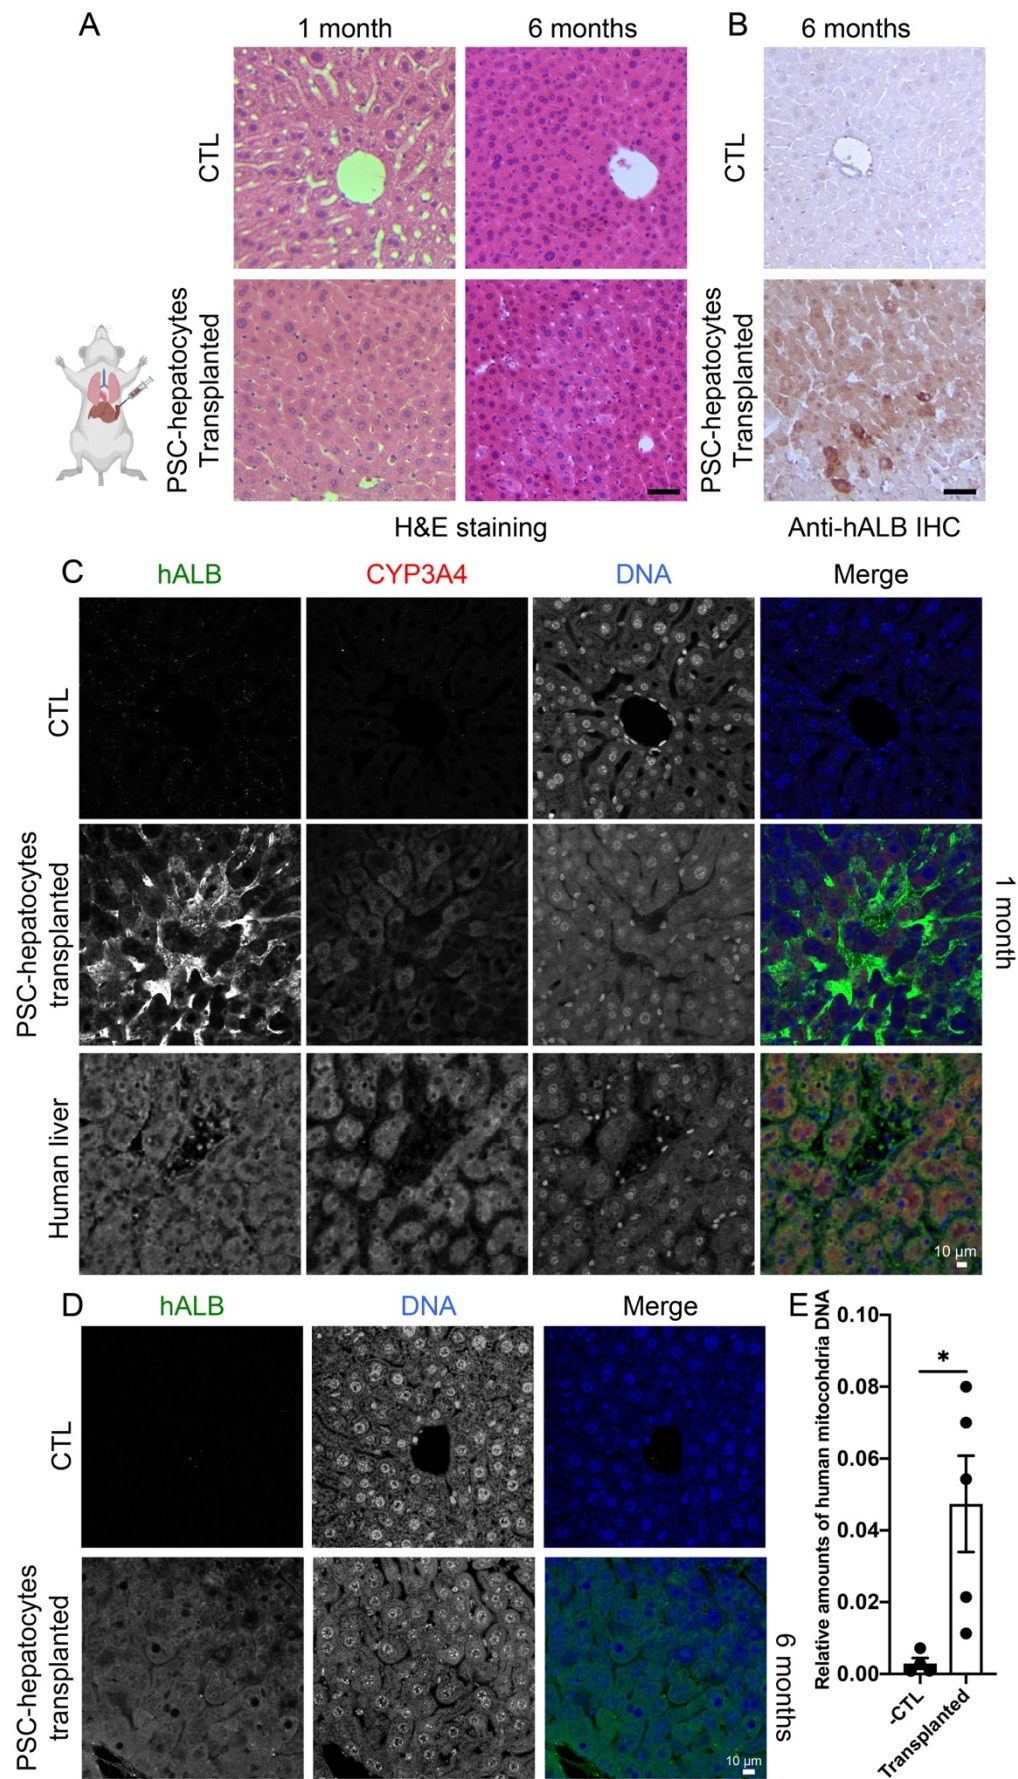

1107

1108 **Figure 6. Engraftment of 3D PSC-hepatocytes into undamaged mouse liver.**

1109 (A) H&E staining of liver from control mice (top panels) or from mice with splenic transplantation of

1110 dissociated human 3D PSC-hepatocytes (bottom panels) at 1 month post transplantation (left panel) or 6

1111 months post transplantation (right panels).

1112 (B) Anti-human albumin (hALB) immunohistochemistry of liver from control mice (top panels) or from

1113 transplanted mice (bottom panels) at 6 months post transplantation.

1114 (C) Immunofluorescence with an anti-human albumin (hAlbumin) antibody (green) and an anti-CYP3A4

1115 antibody (red) on control mouse liver (top panel), liver from transplanted mice (middle panel) 1 month post

1116 transplantation, or human liver (bottom panel).

1117 (D) Immunofluorescence with an anti-human albumin antibody staining (green) of control mouse liver (top

1118 panel), or liver from transplanted mice (bottom panel) 6 months post transplantation.

1119 (E) Quantification of human mitochondrial DNA from DNA samples isolated from slices from control mice

1120 or transplanted mice. Plotted data are mean  $\pm$  s.e.m.,  $n=4$  for control,  $n=5$  for transplanted mice. \*

1121 denotes  $P<0.05$ , two-sided Student's  $t$  test.

1122 Scale bars in (A) and (B): 50  $\mu\text{m}$ . Scale bars in (C) and (D): 10  $\mu\text{m}$ .
